# Supplementary figures and images for: Evaluation of Neurotropic Activity and Molecular Docking Study of New Derivatives of pyrano[4″,3″:4′,5′]pyrido[3′,2′:4,5]thieno[3,2-d]pyrimidines on the Basis of pyrano[3,4-c]pyridines
Source: MDPI journal article supplement (doi:10.3390/molecules27113380), 2022-05-24

Compound 4b

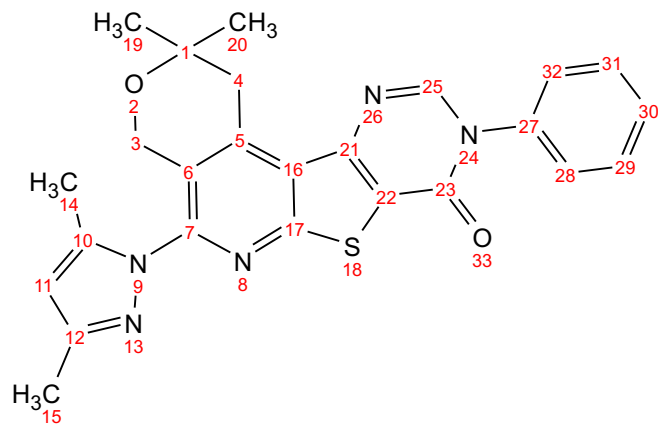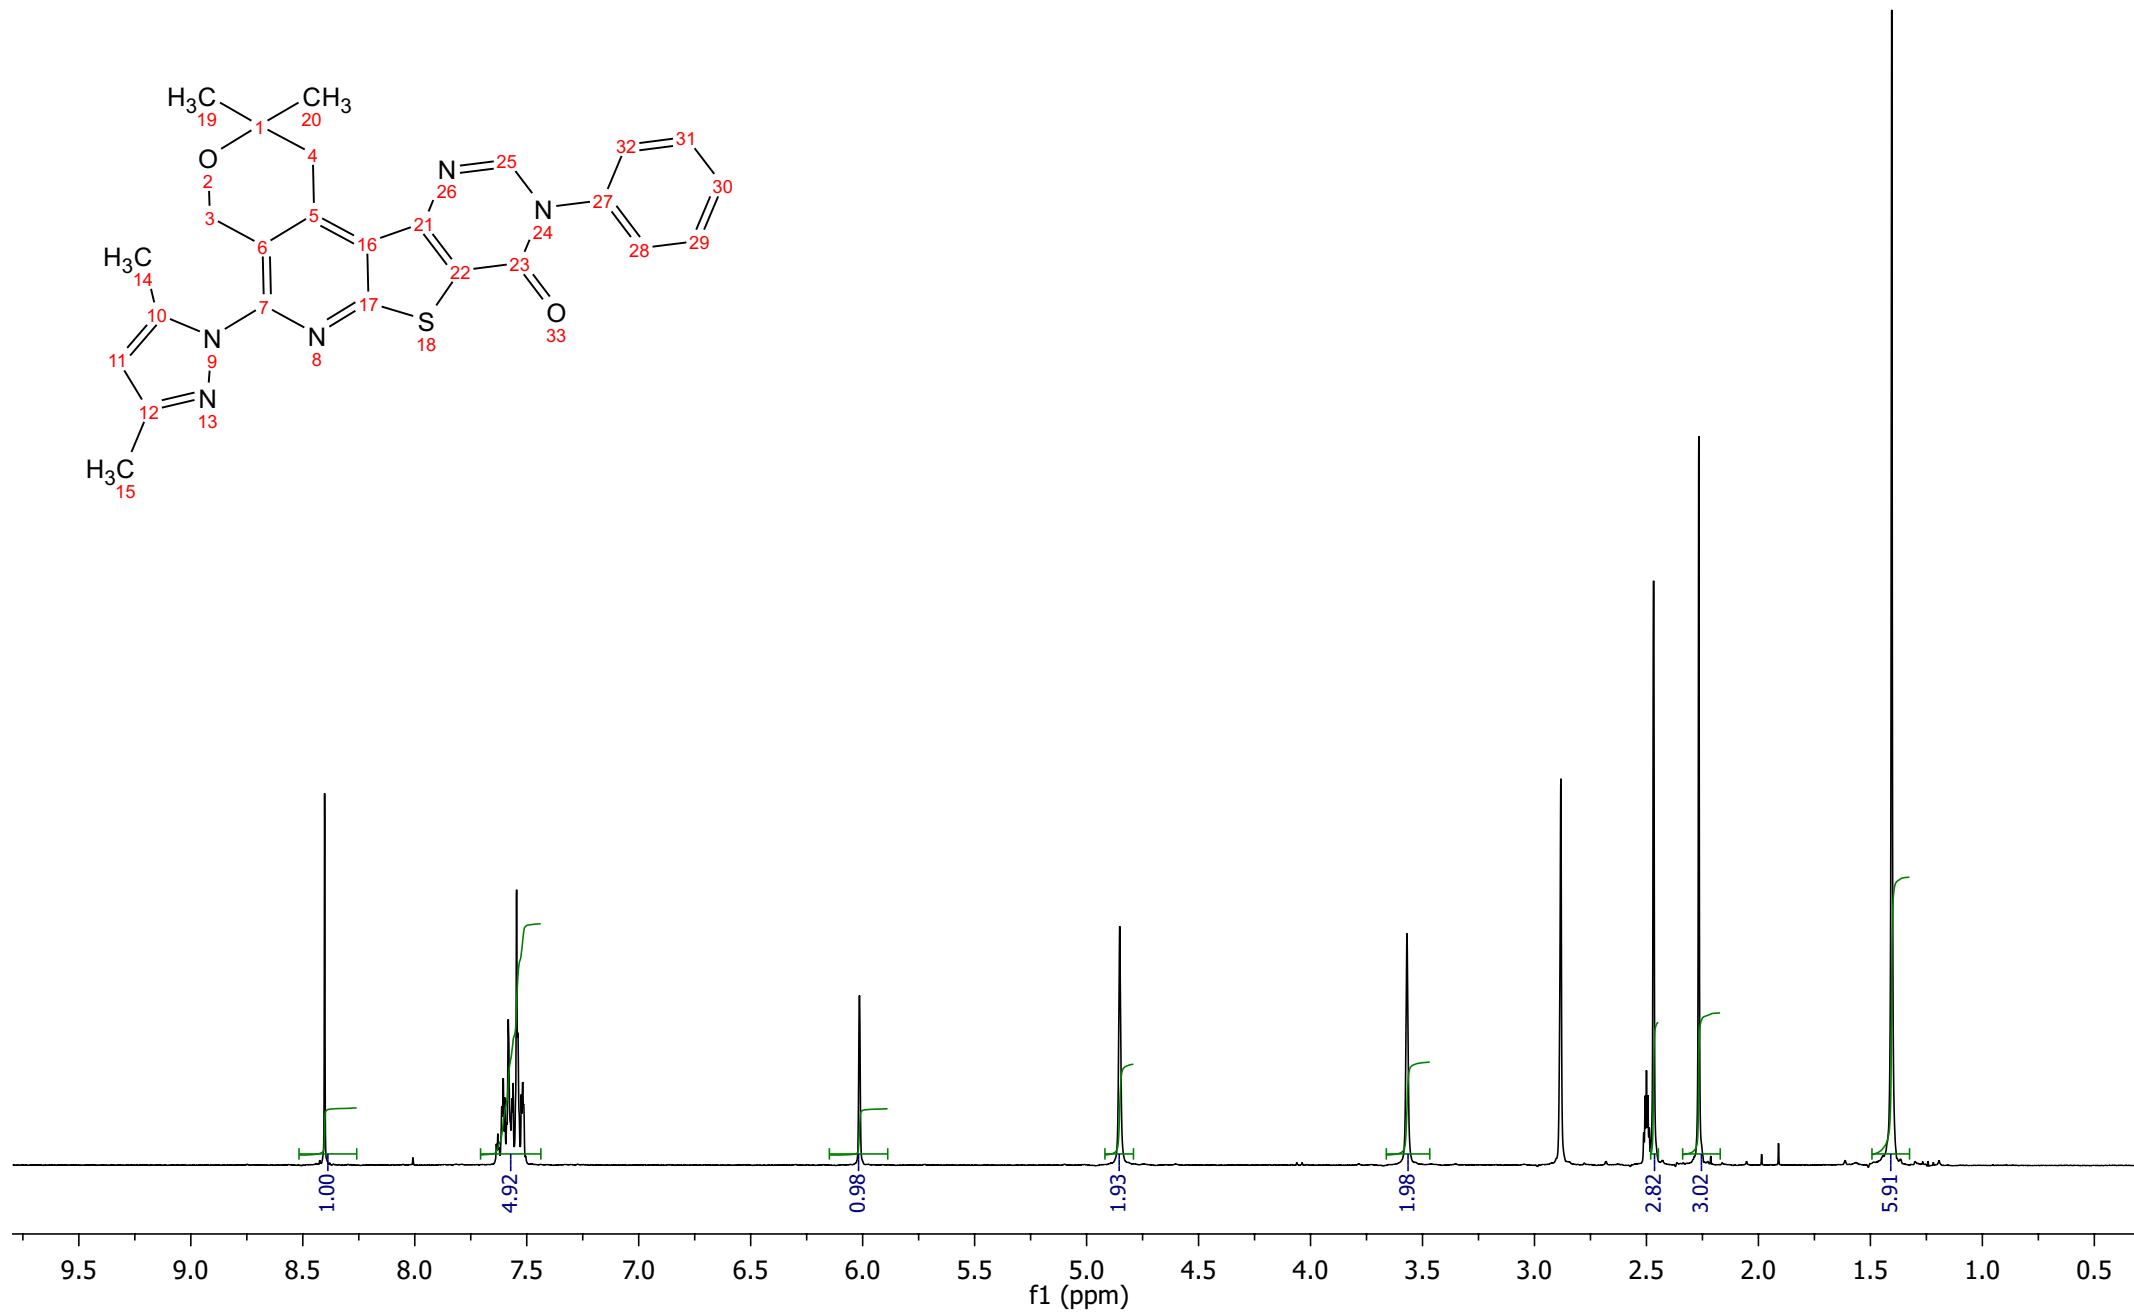

Supplement: s1 [file s1]

Compound 4a

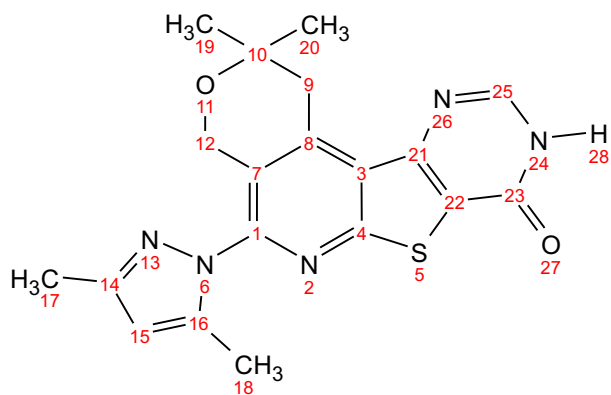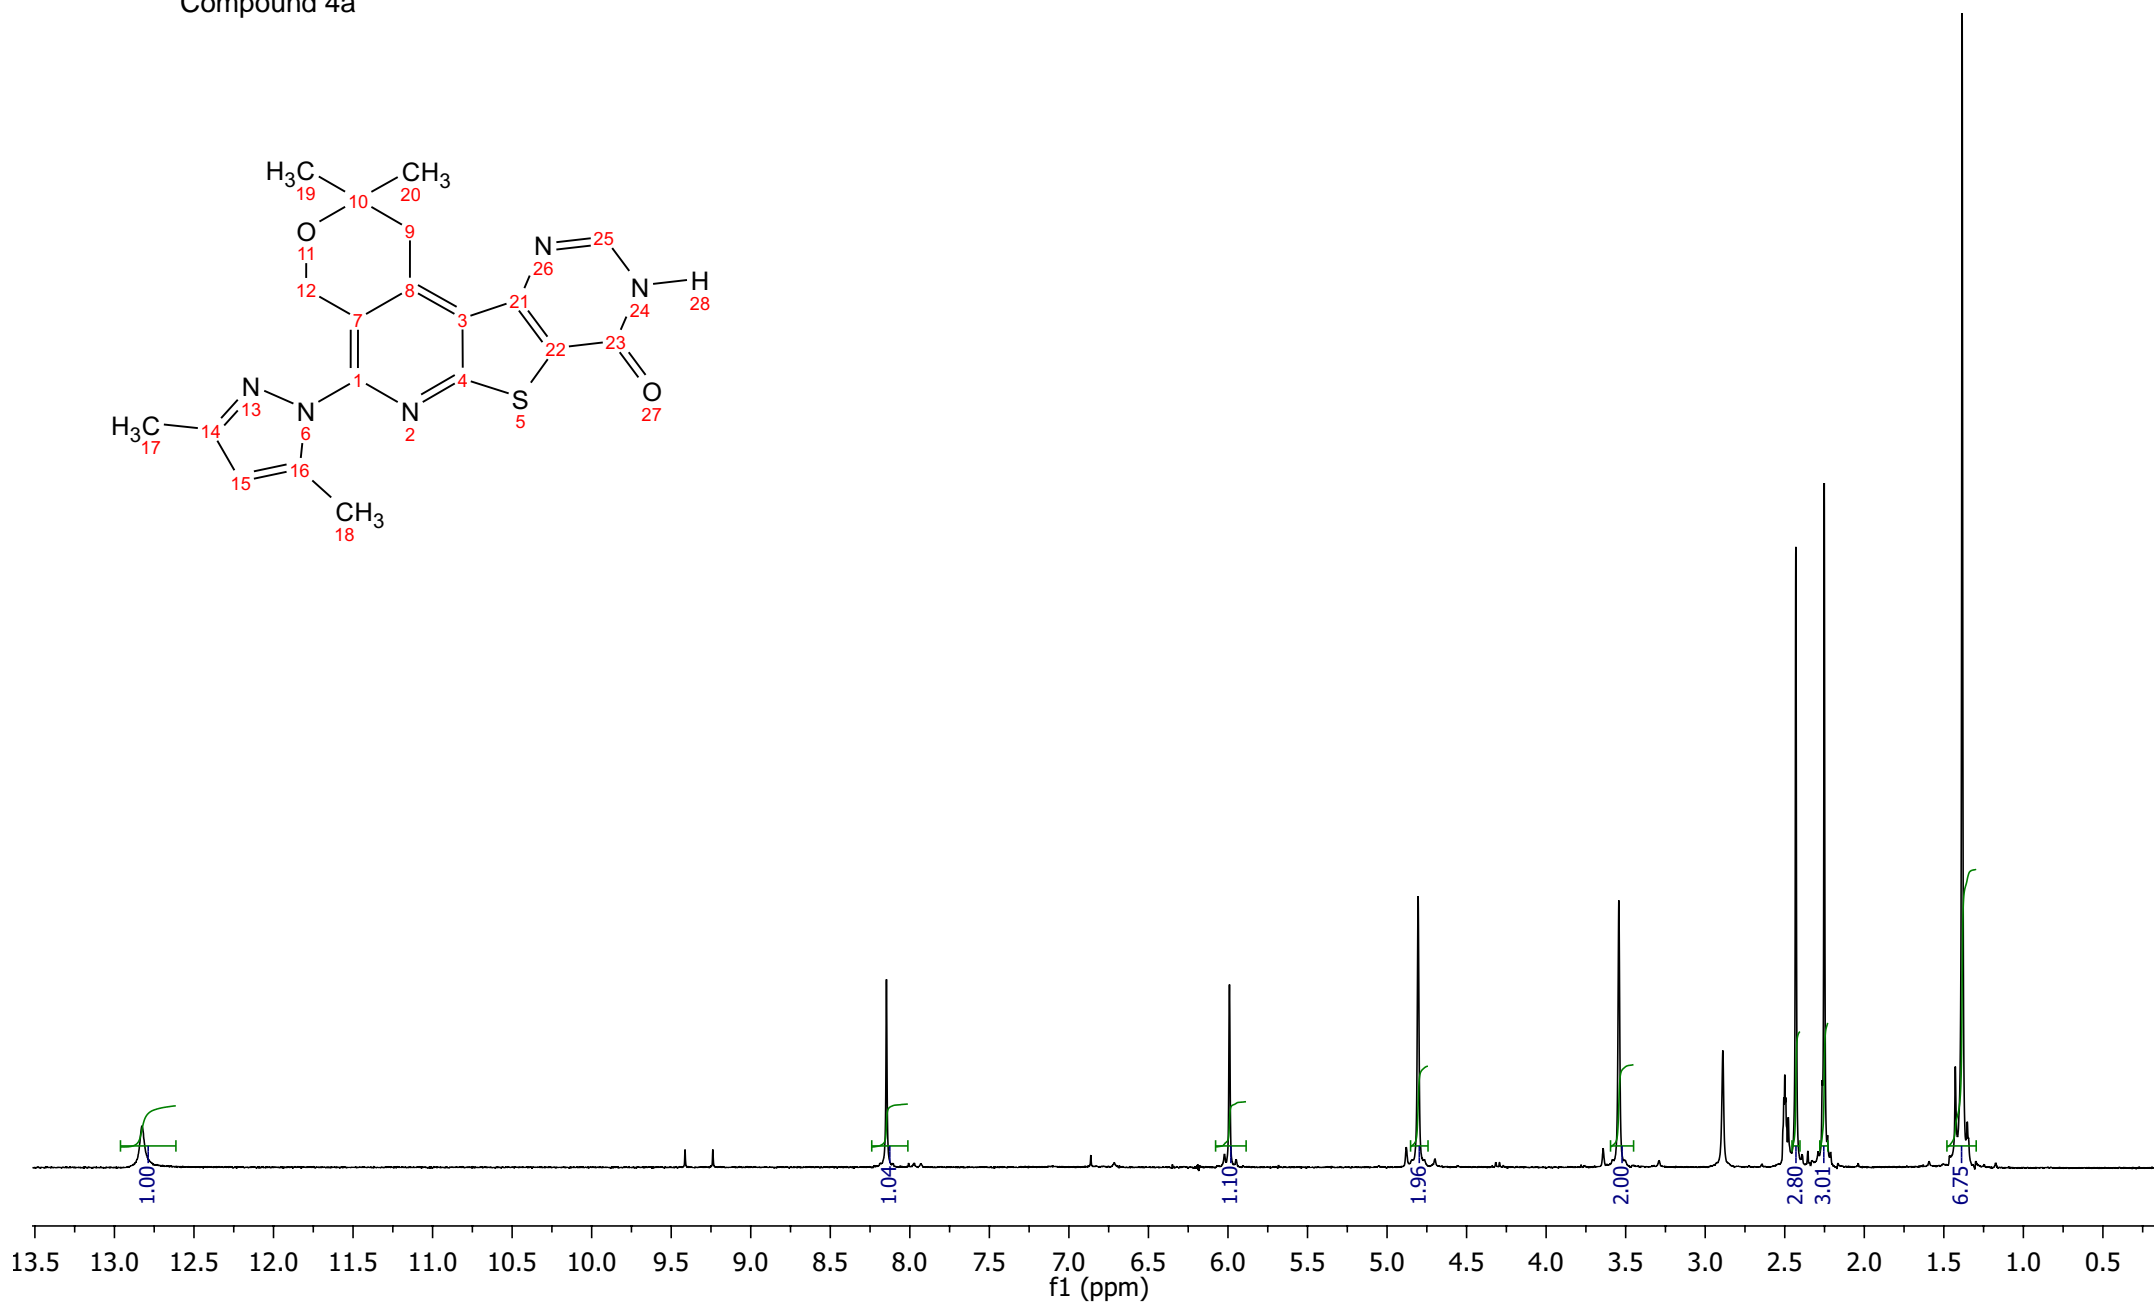

Supplement: s1 [file s1]

Compound 3b

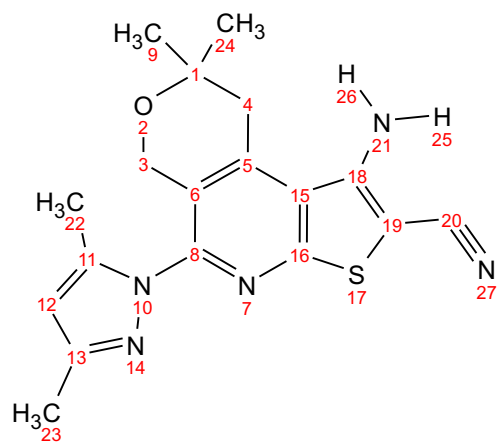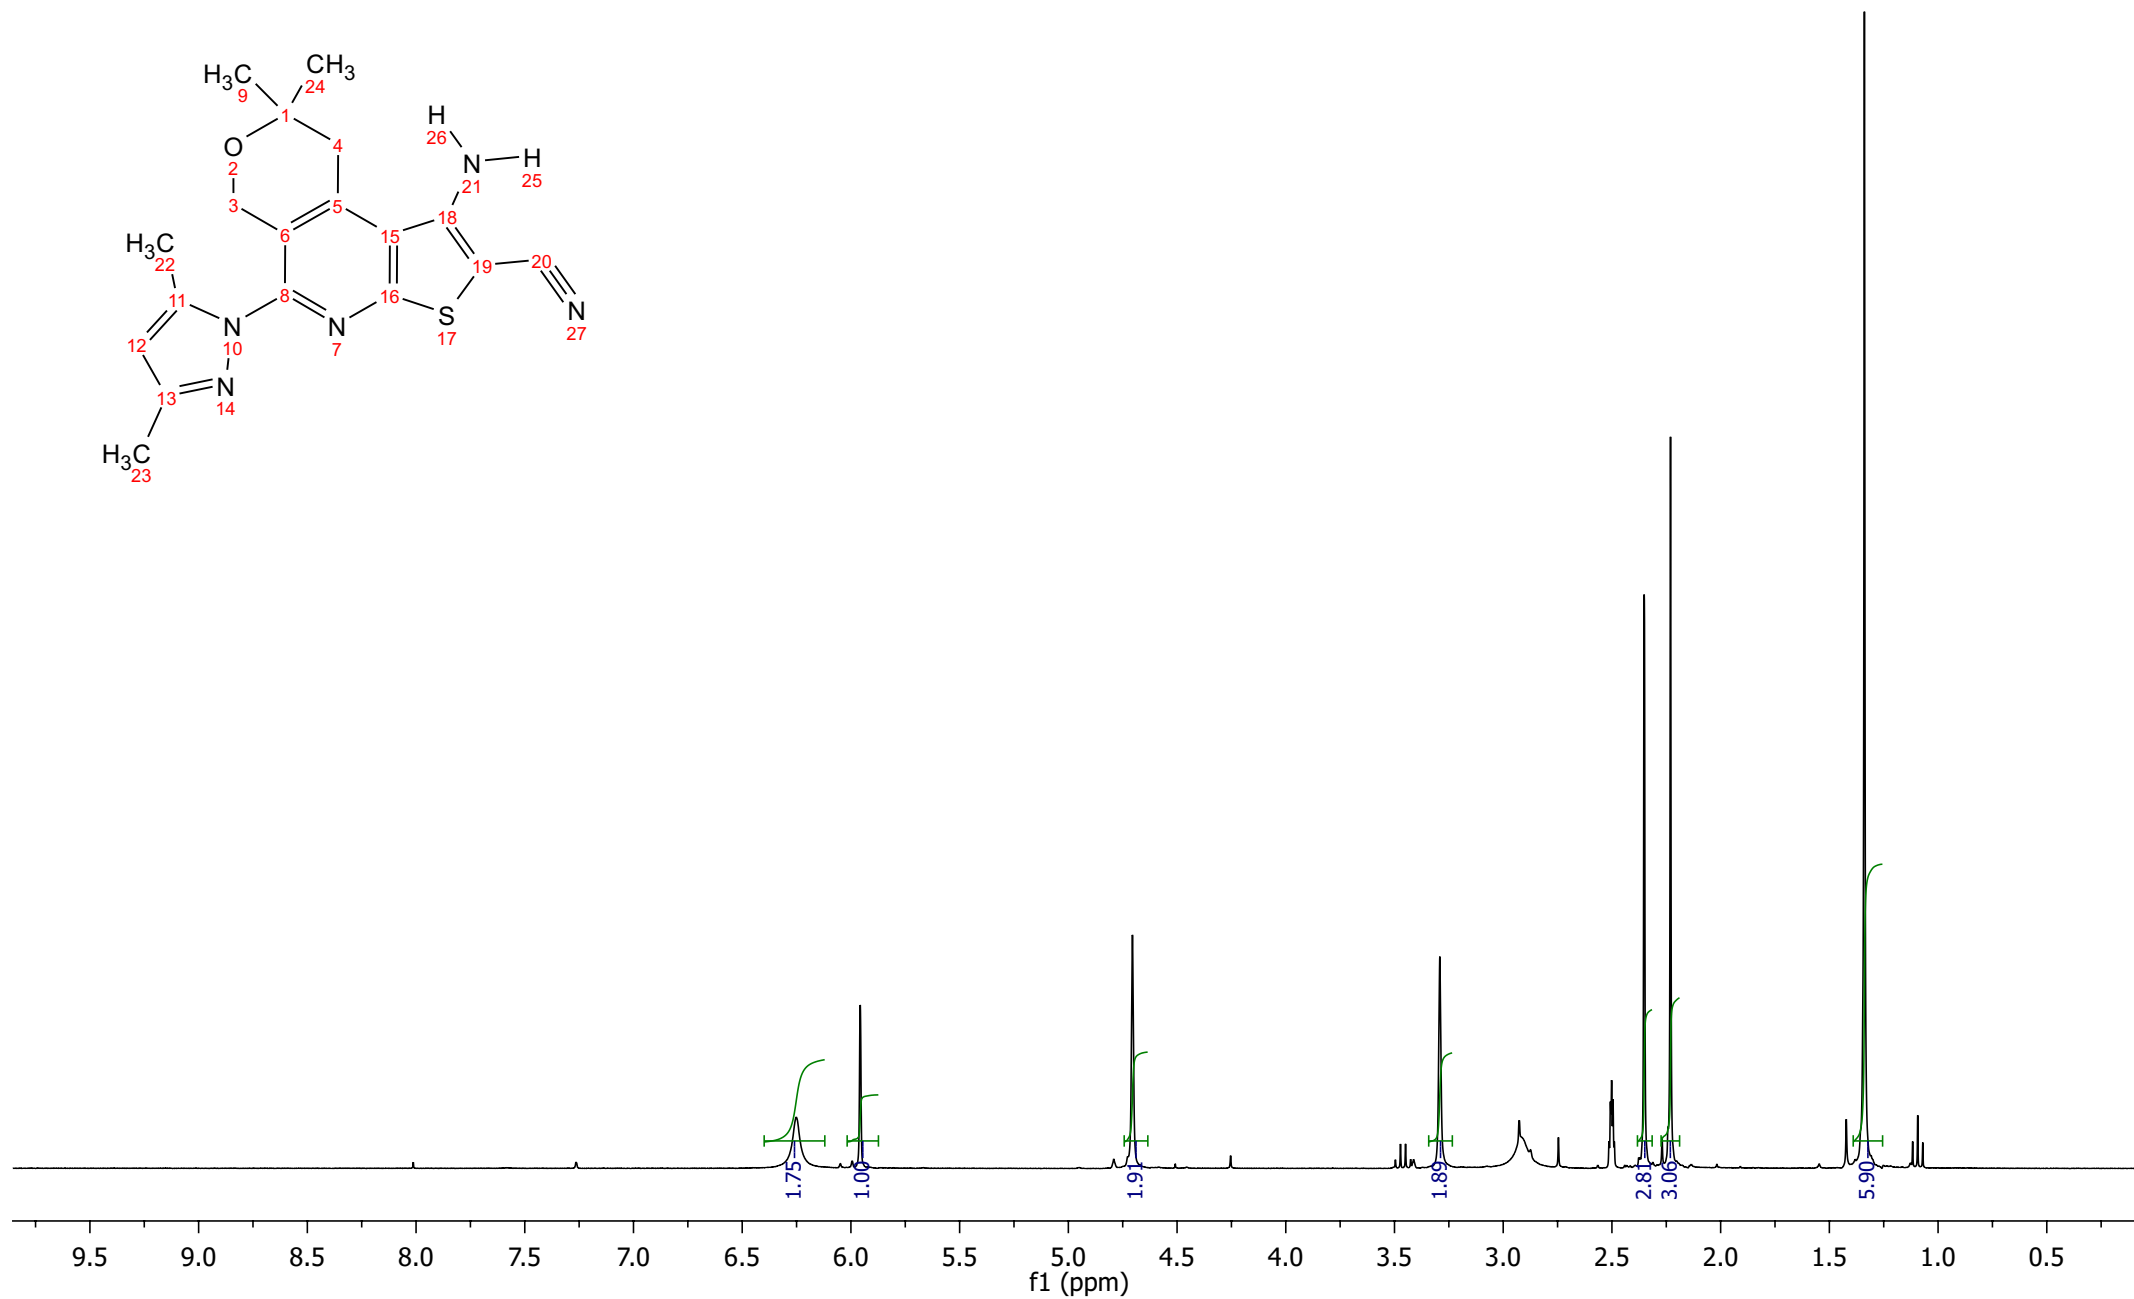

Supplement: s1 [file s1]

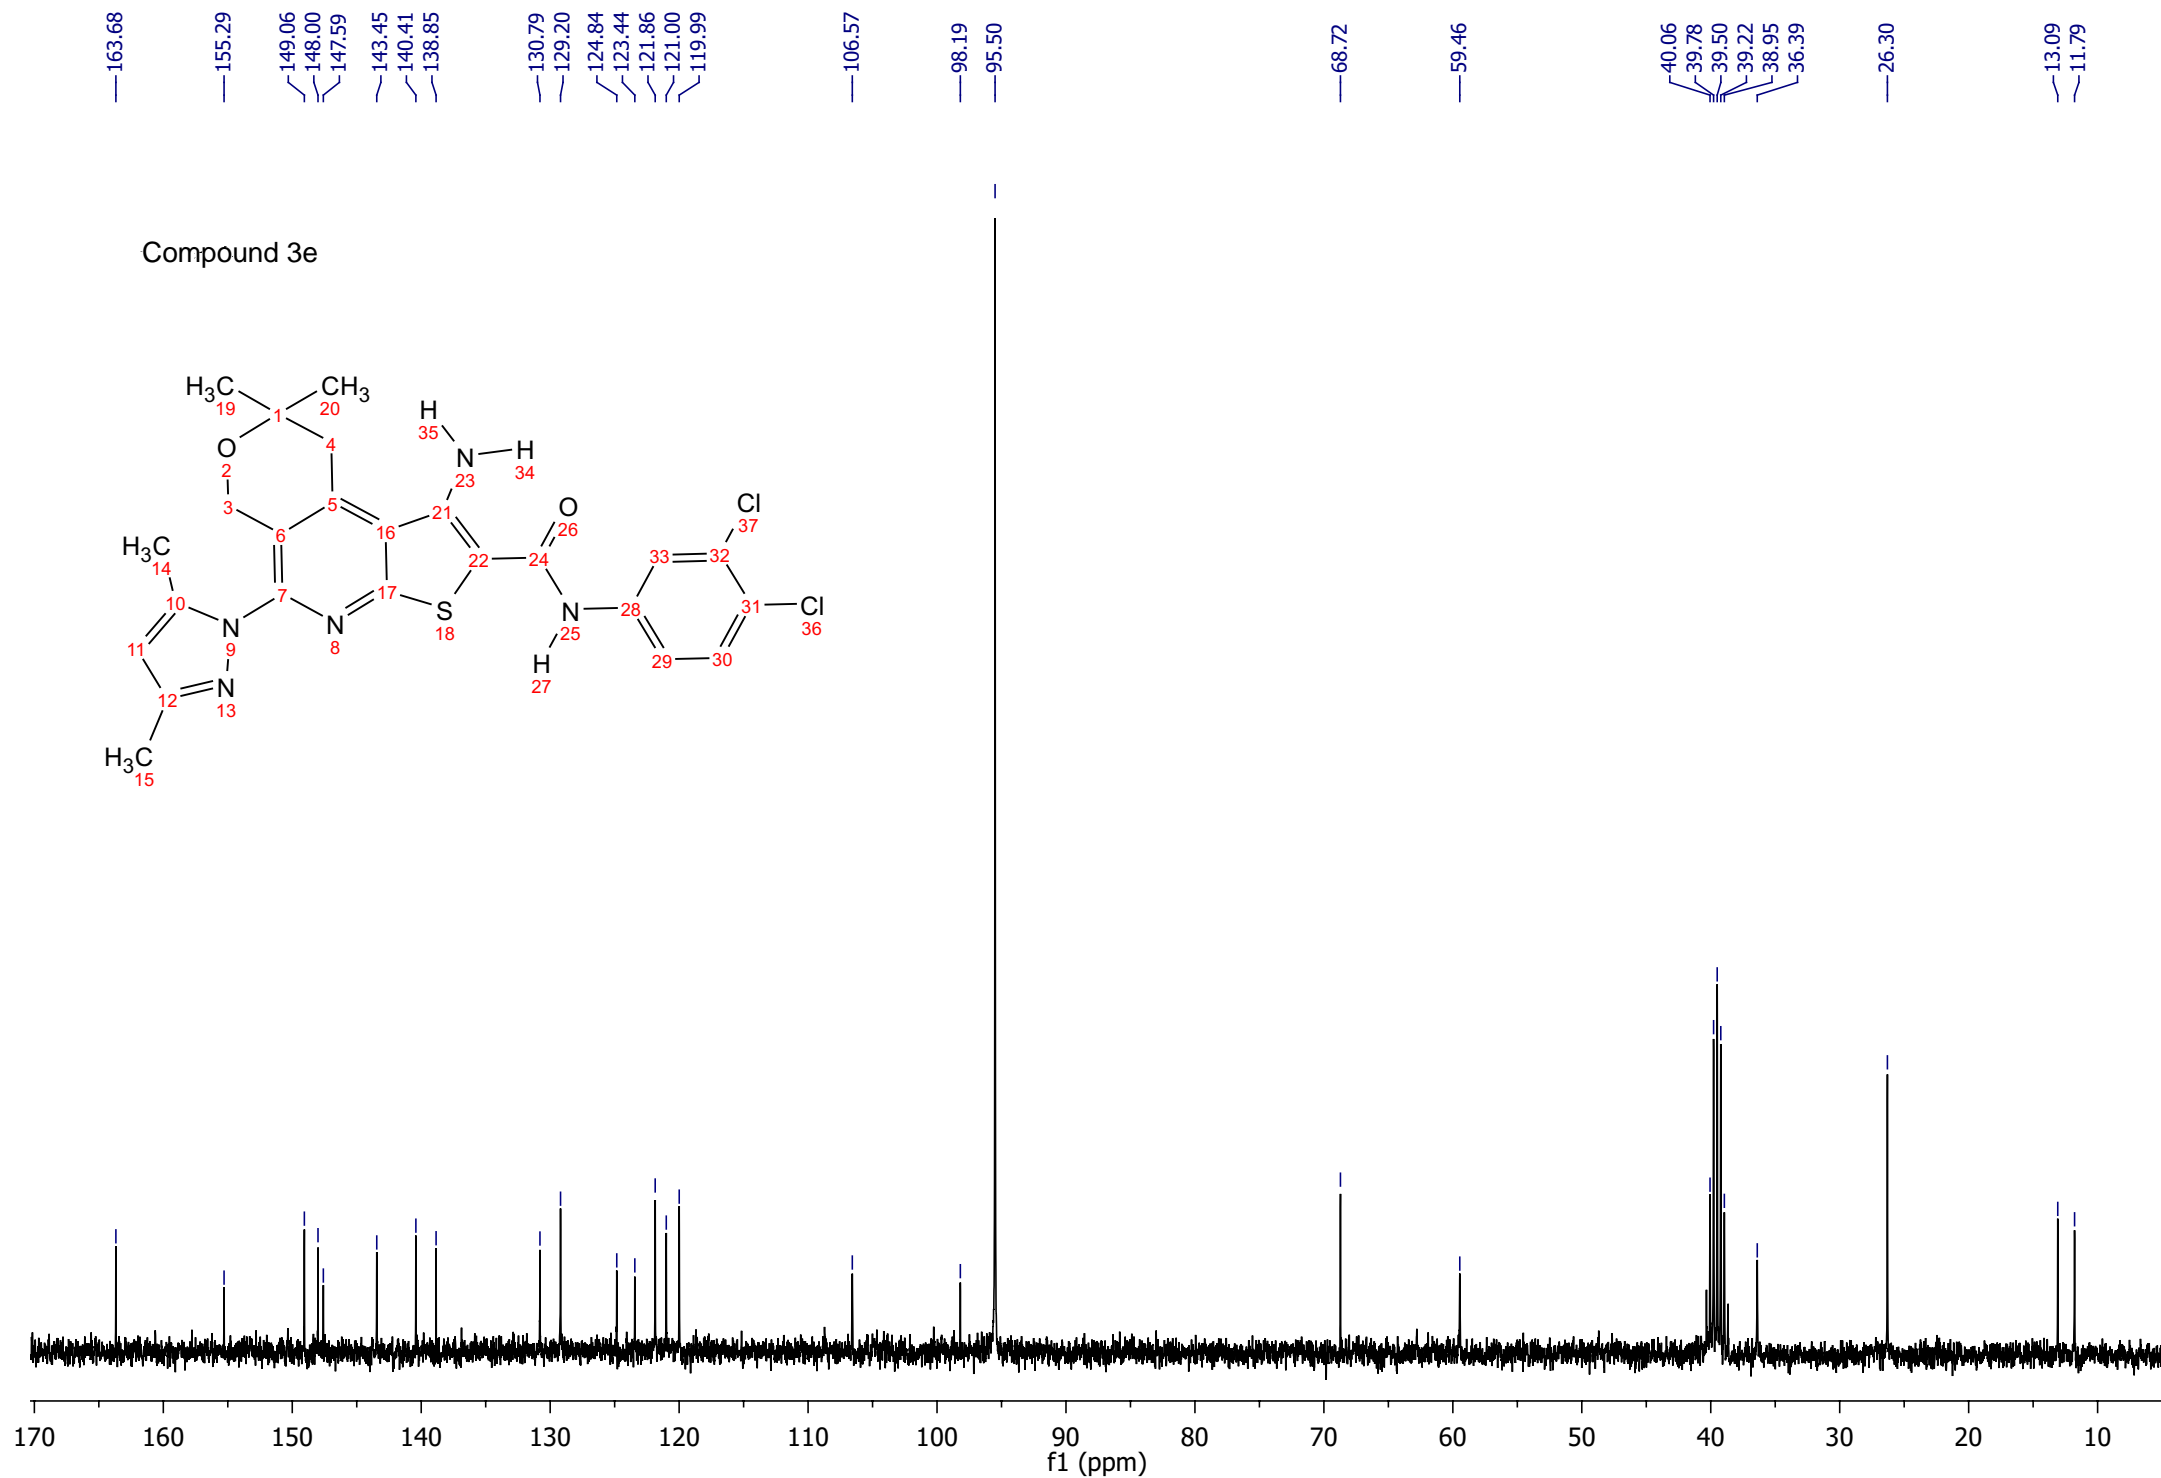

Supplement: s1 [file s1]

Compound 4d

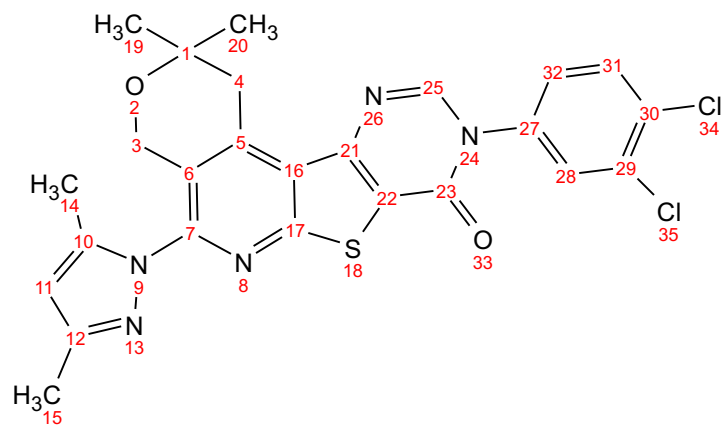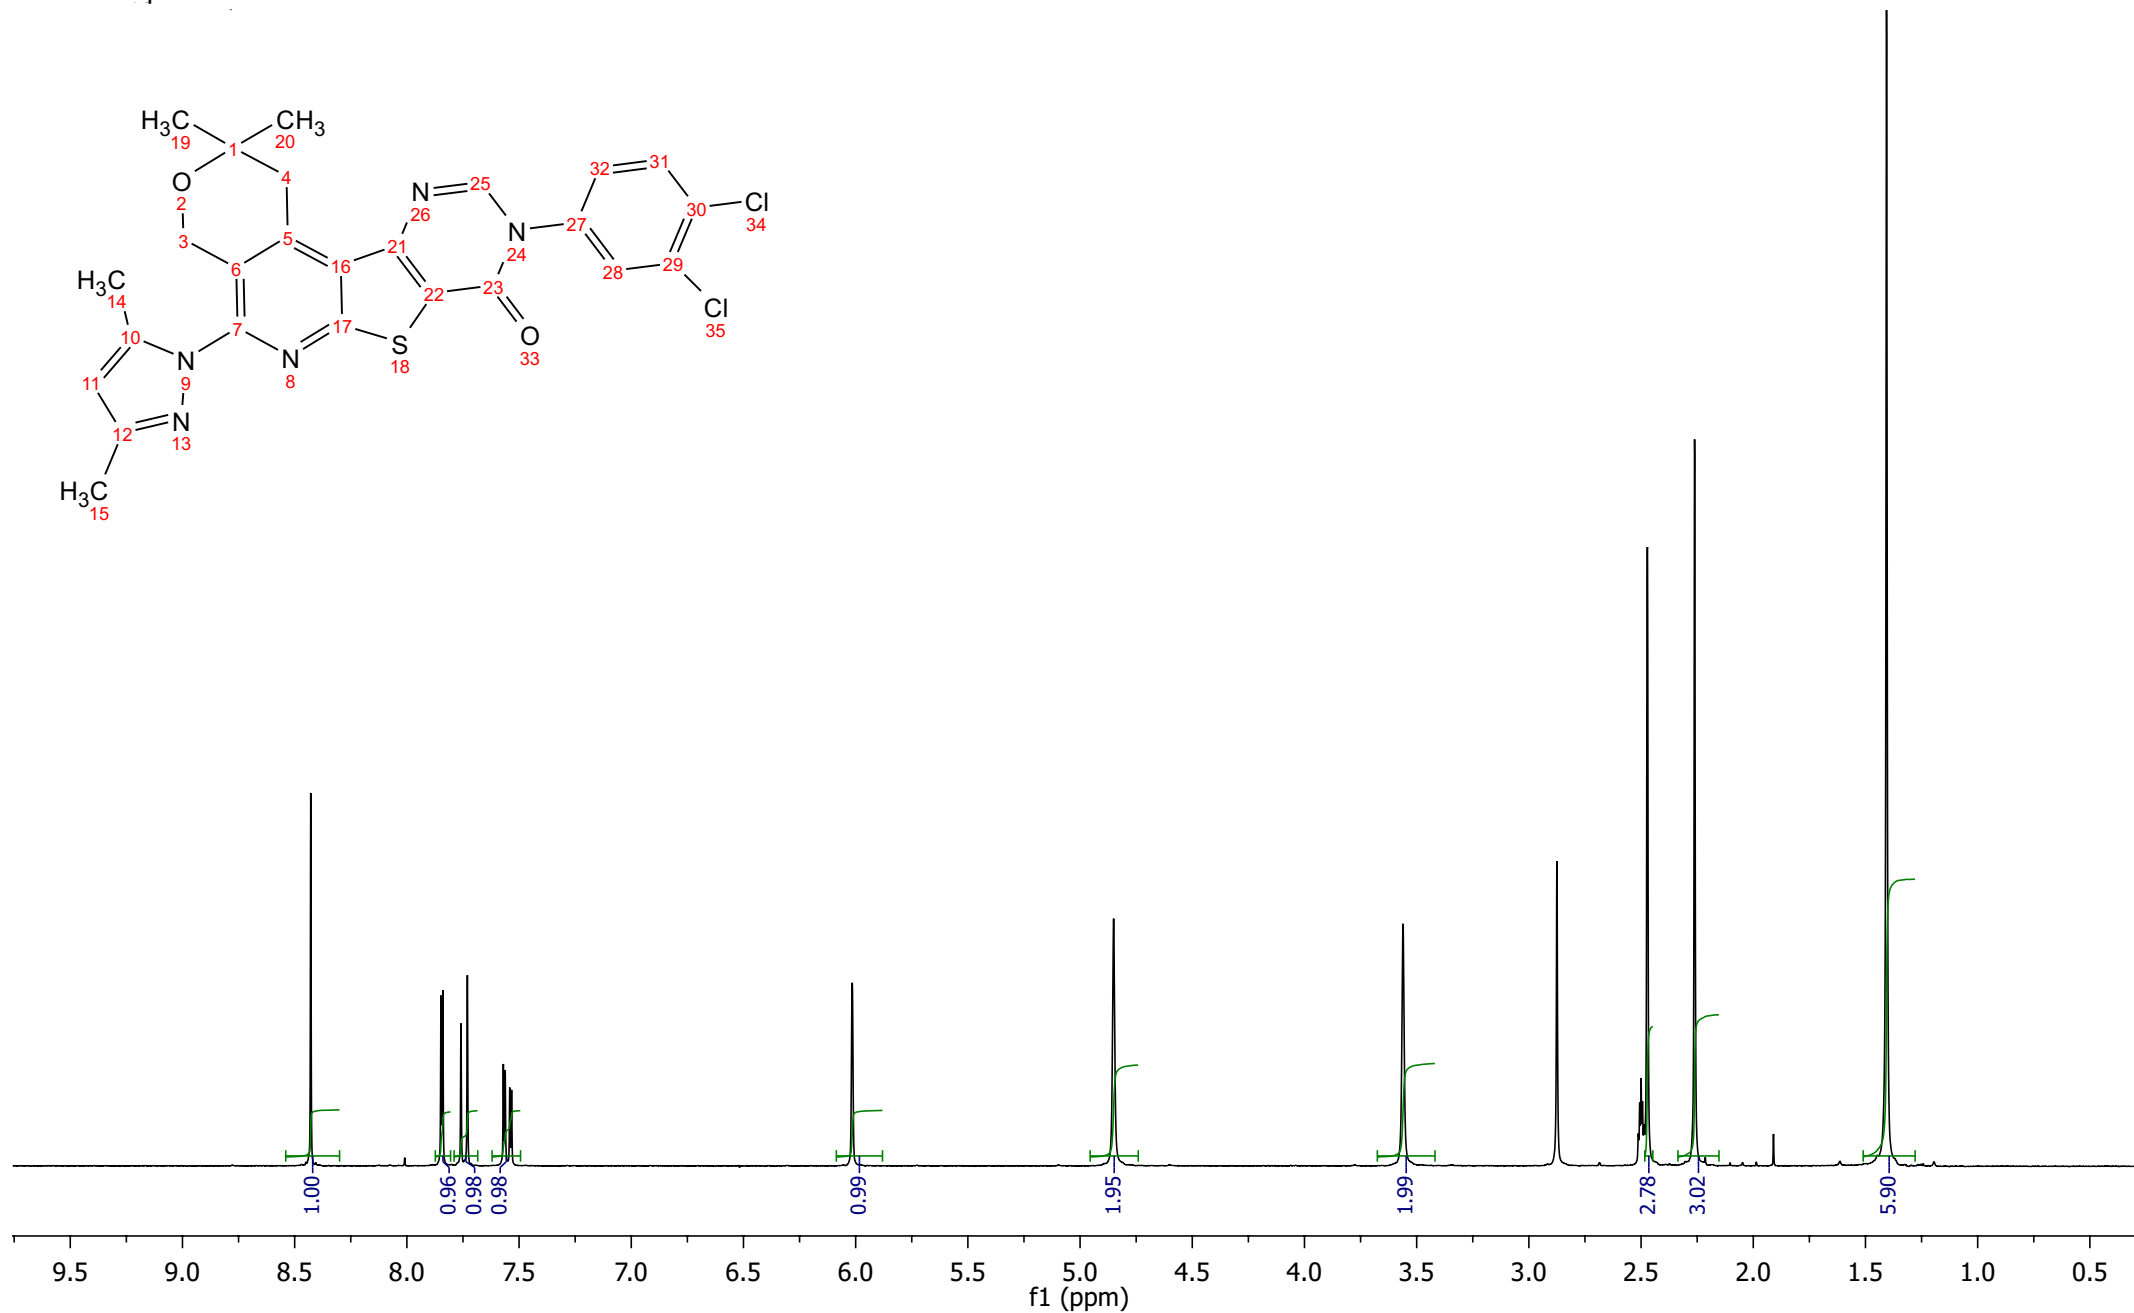

Supplement: s1 [file s1]

Compound 4d

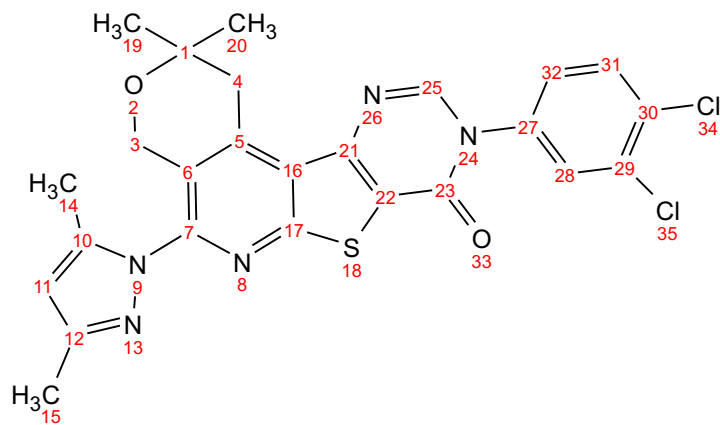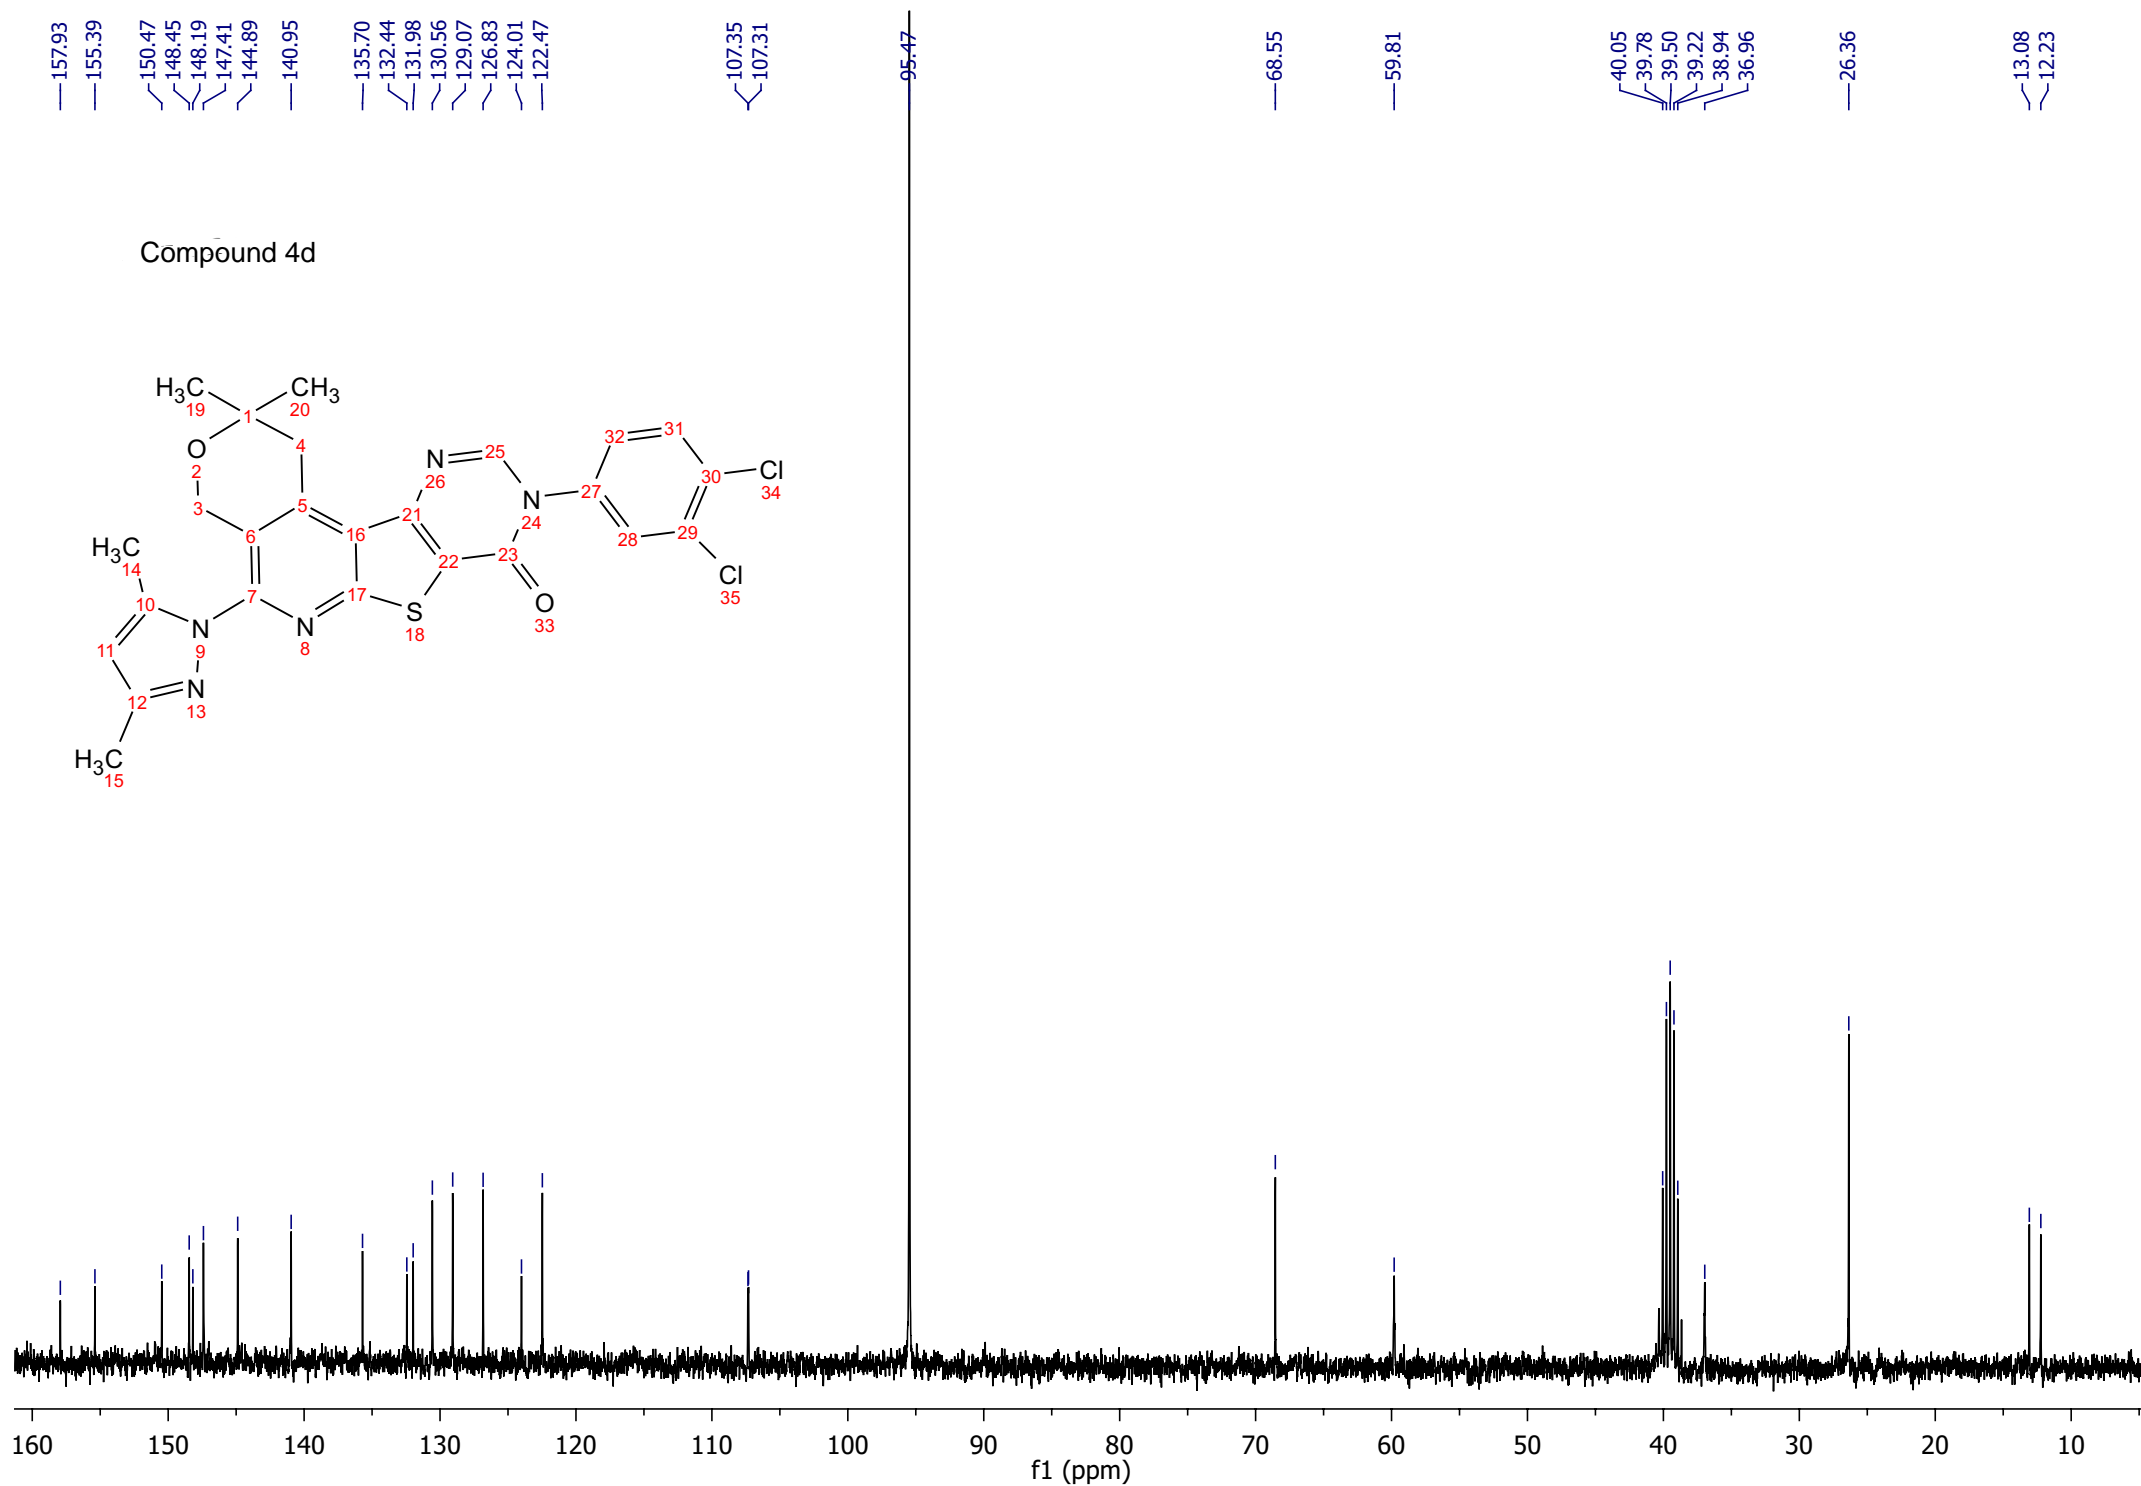

Supplement: s1 [file s1]

Compound 3f

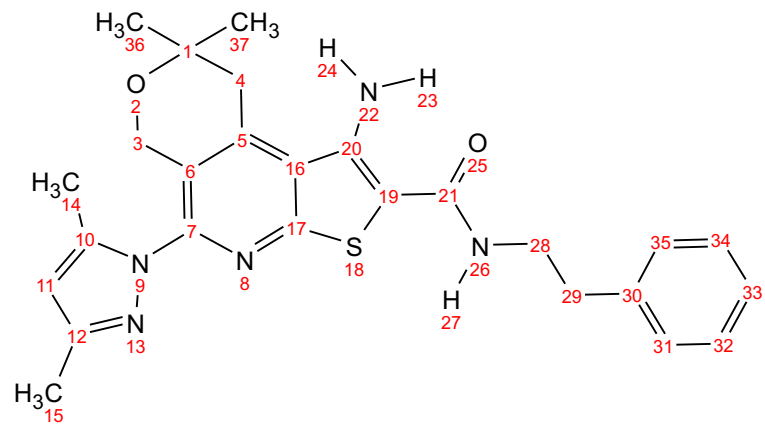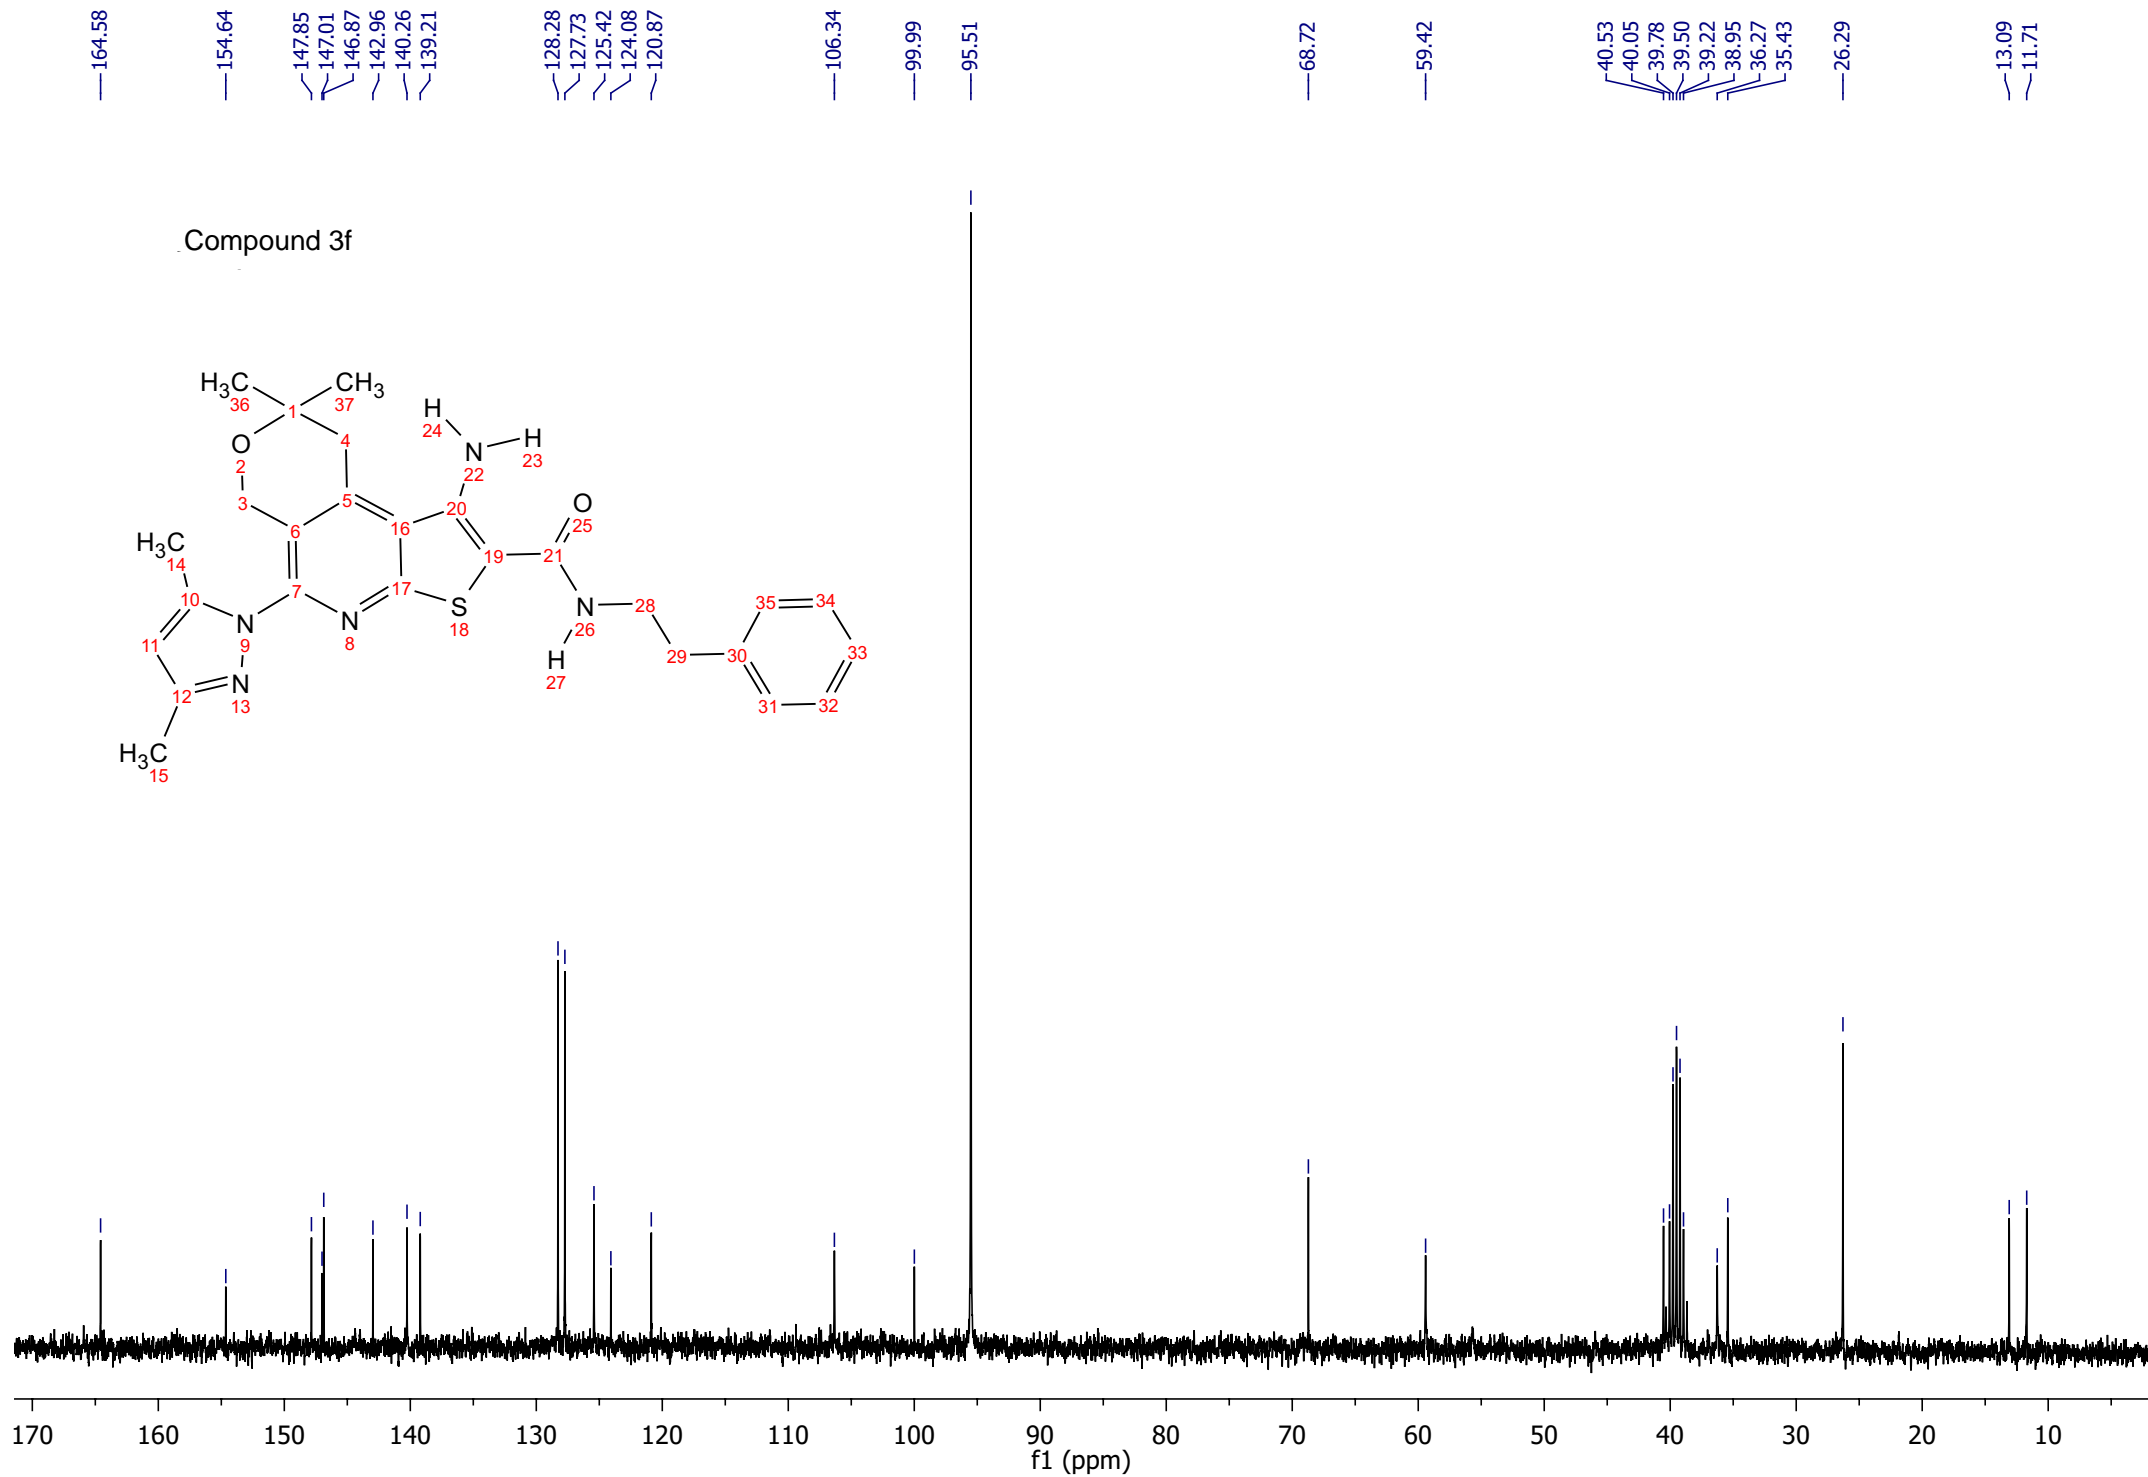

Supplement: s1 [file s1]

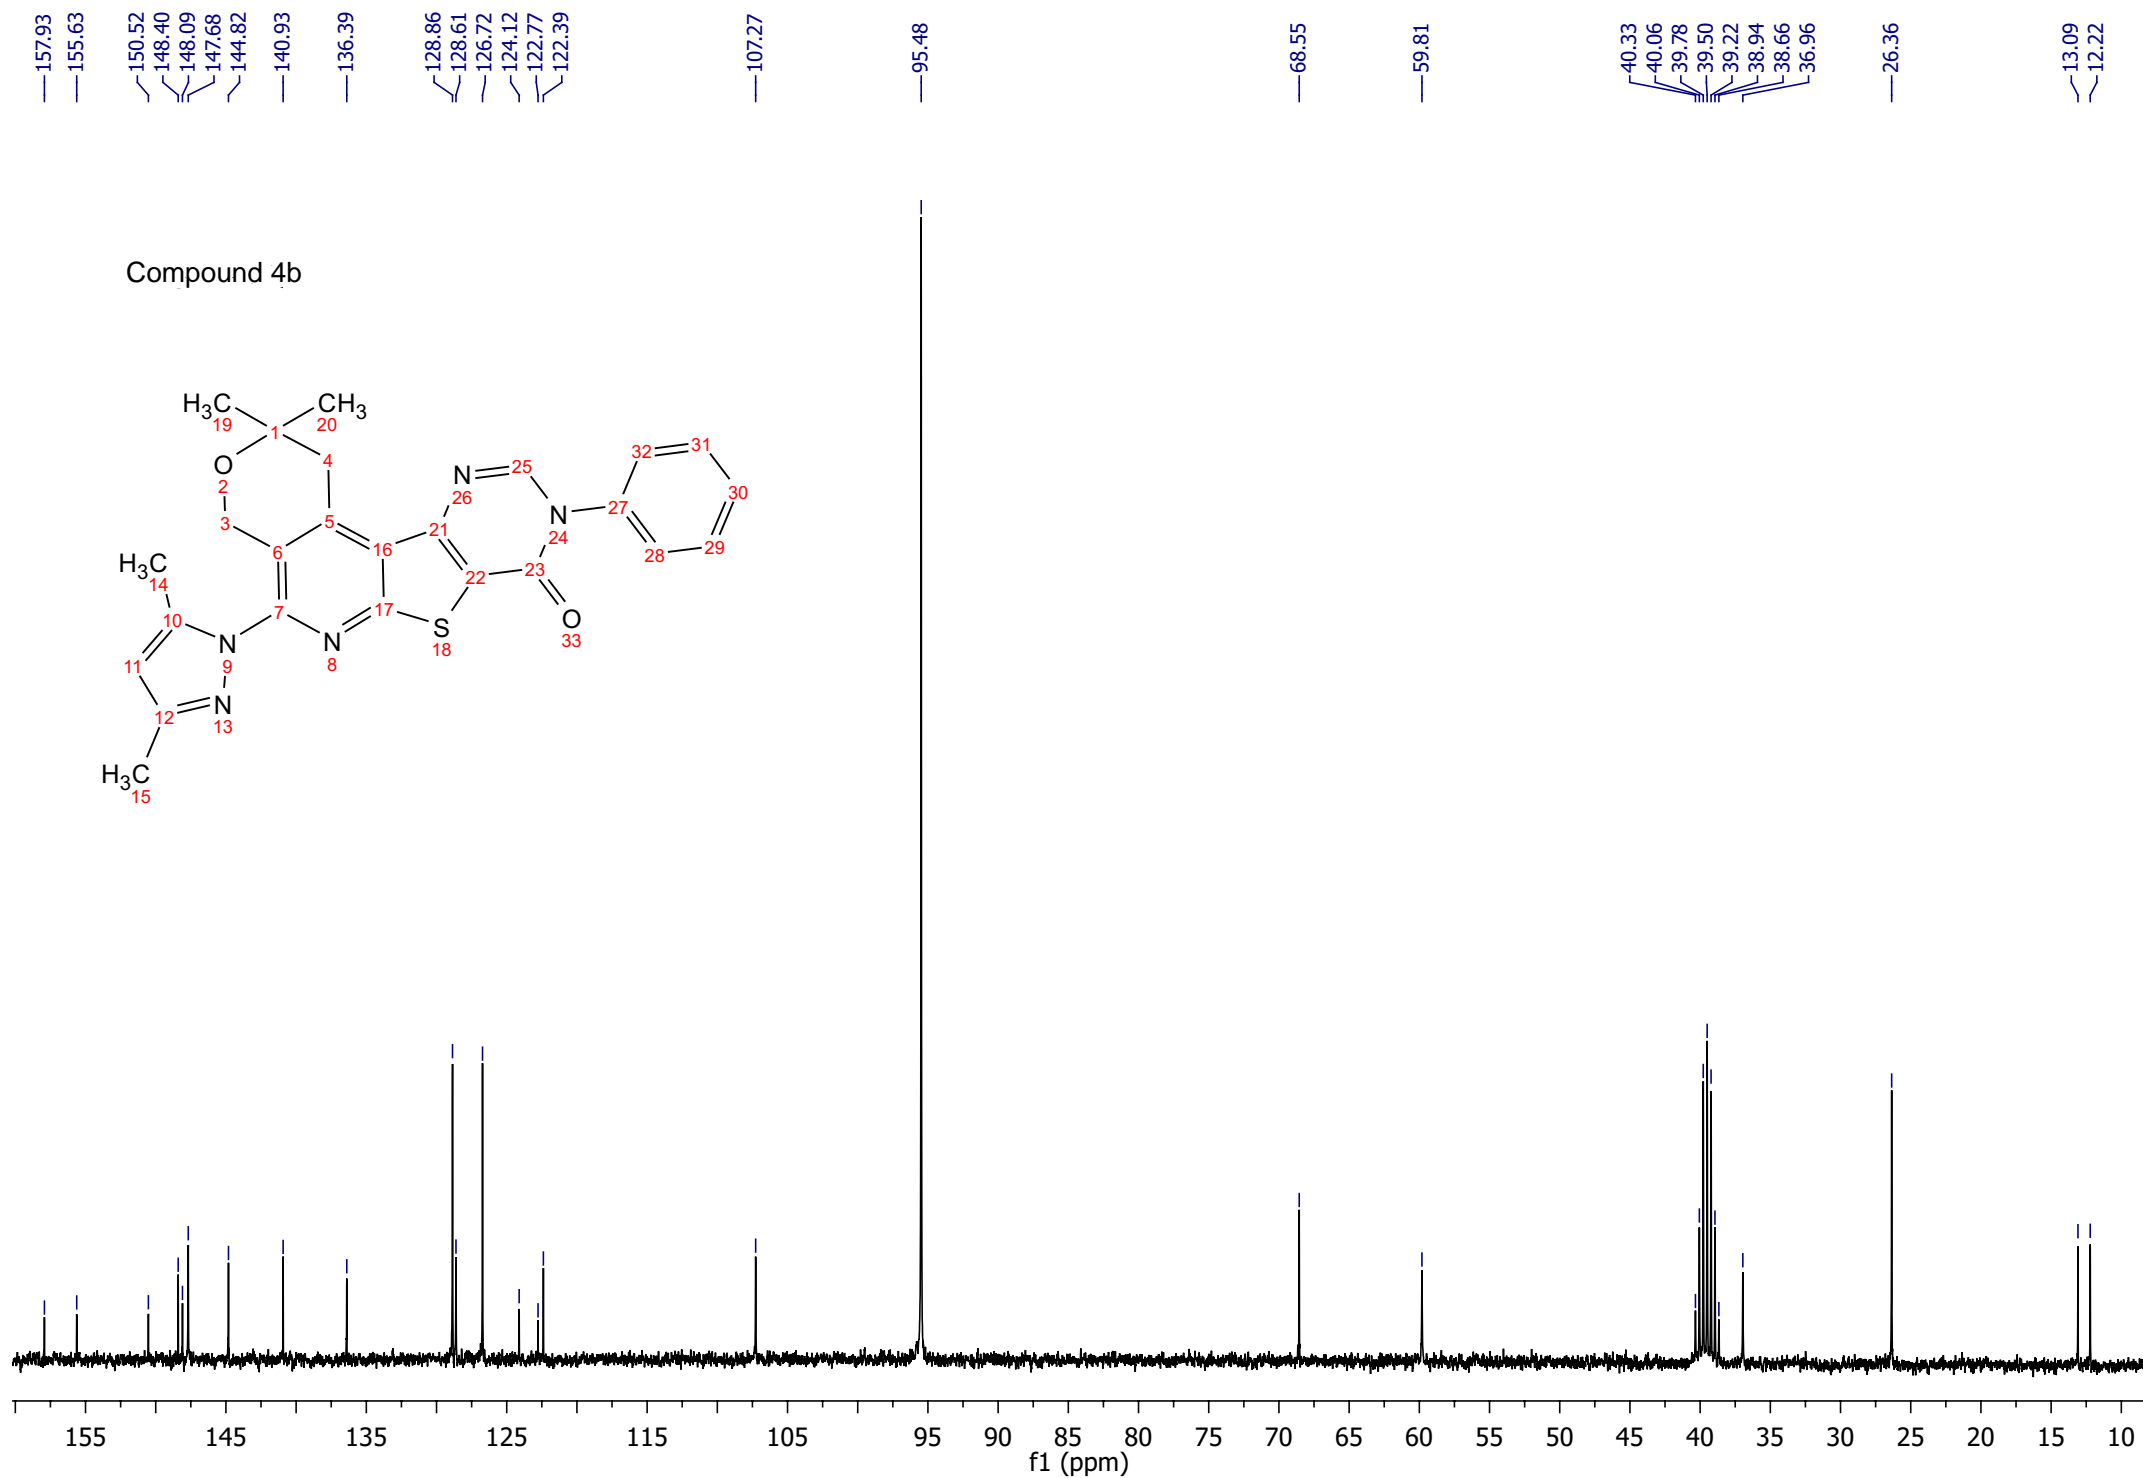

Supplement: s1 [file s1]

Compound 3c

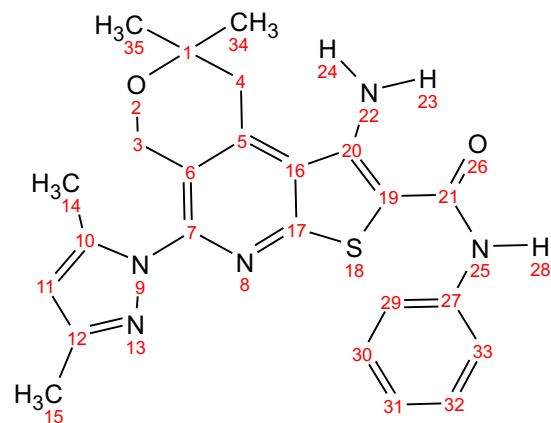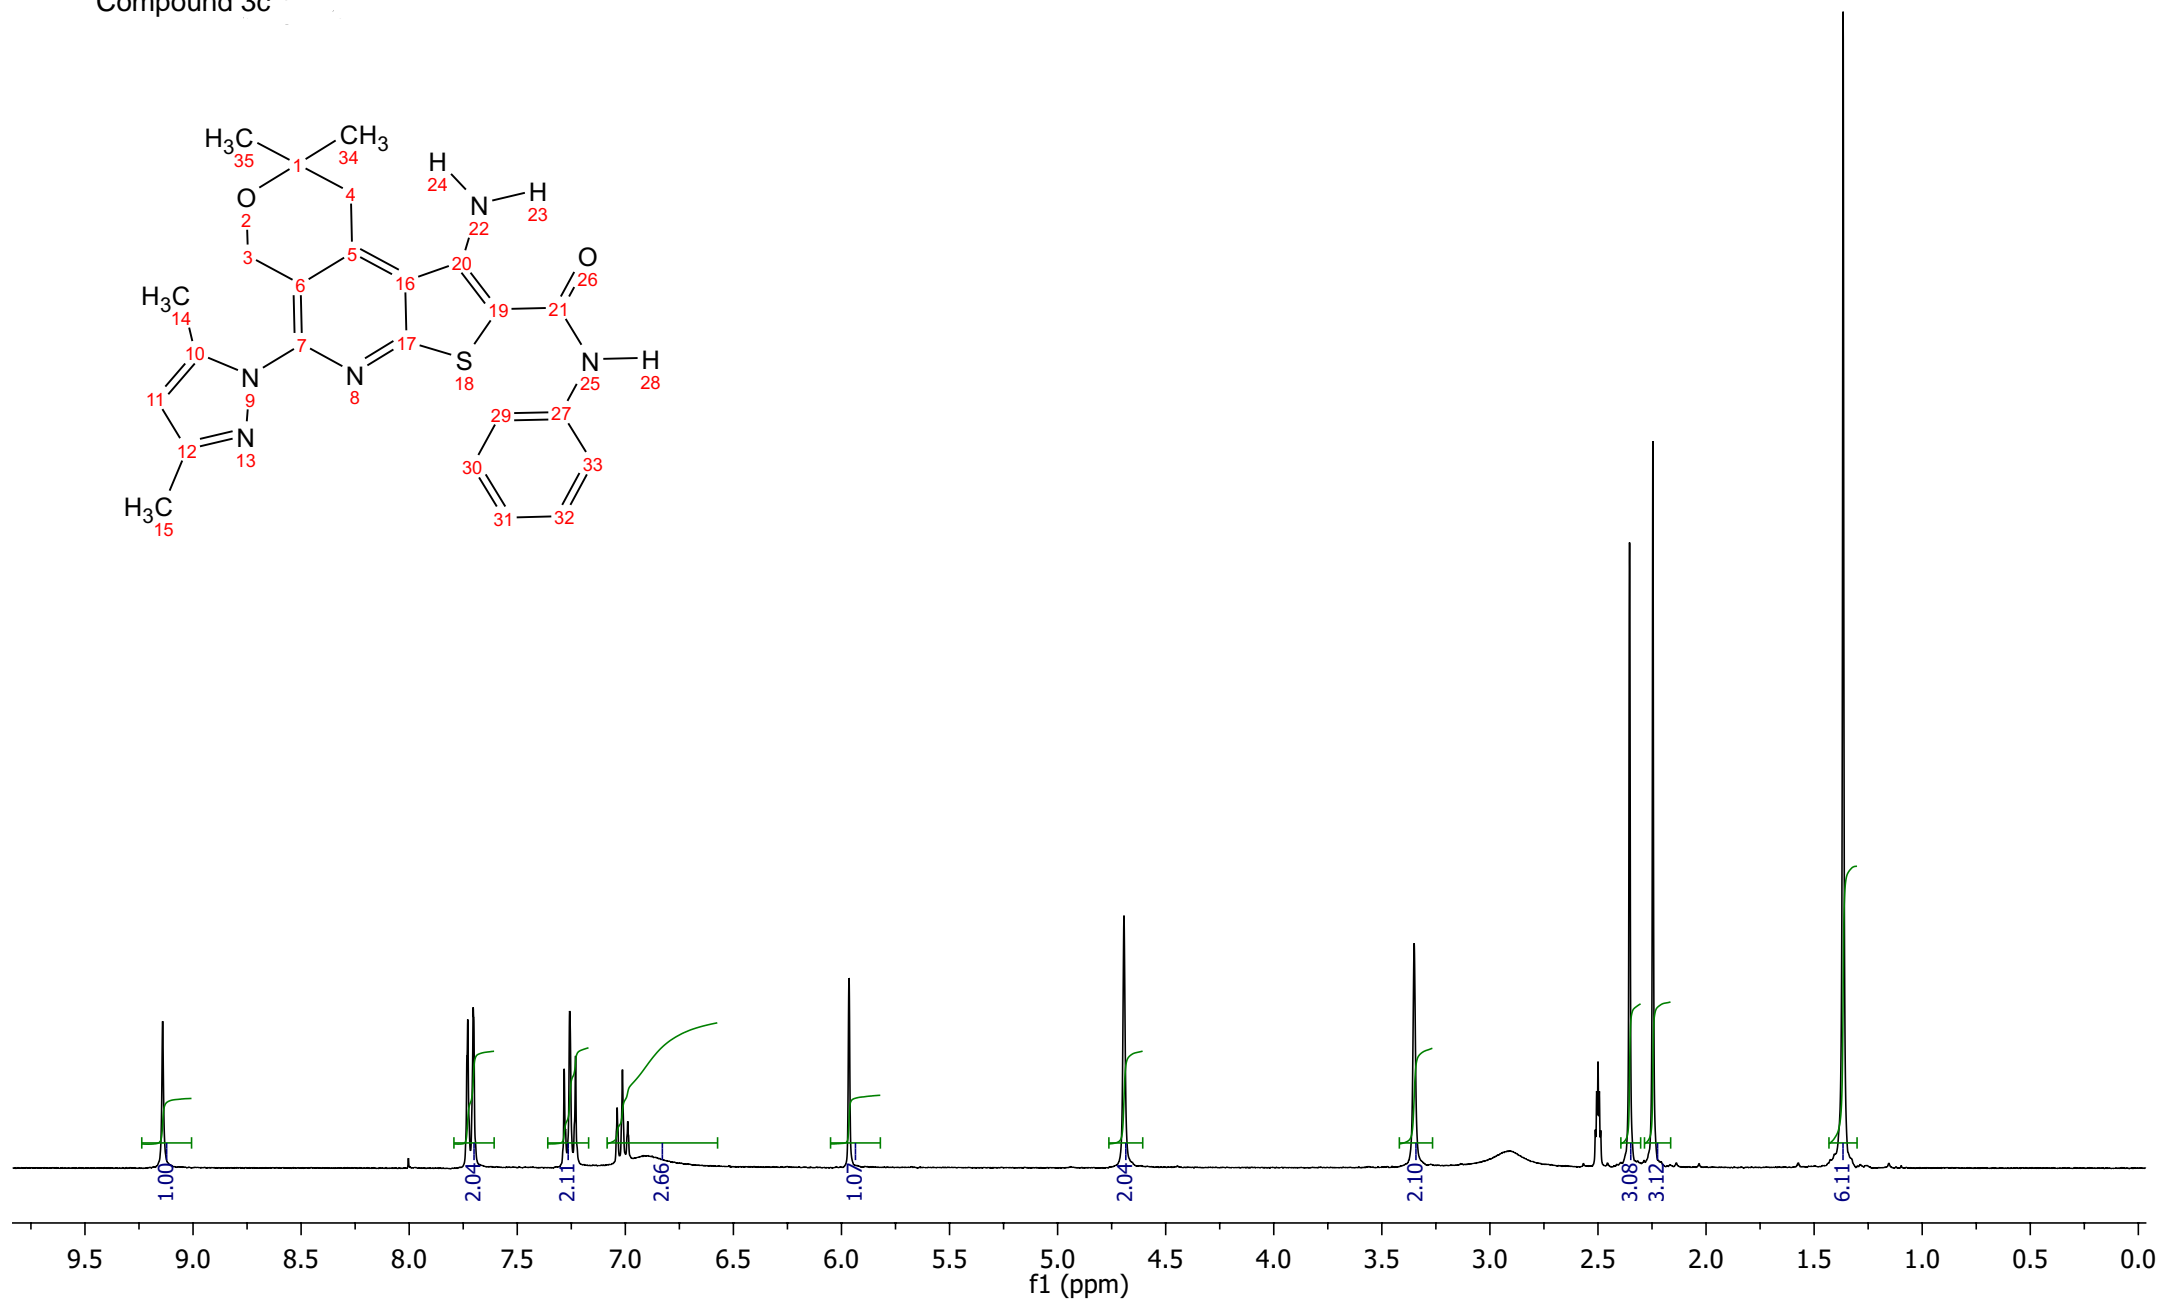

Supplement: s1 [file s1]

Compound 3d

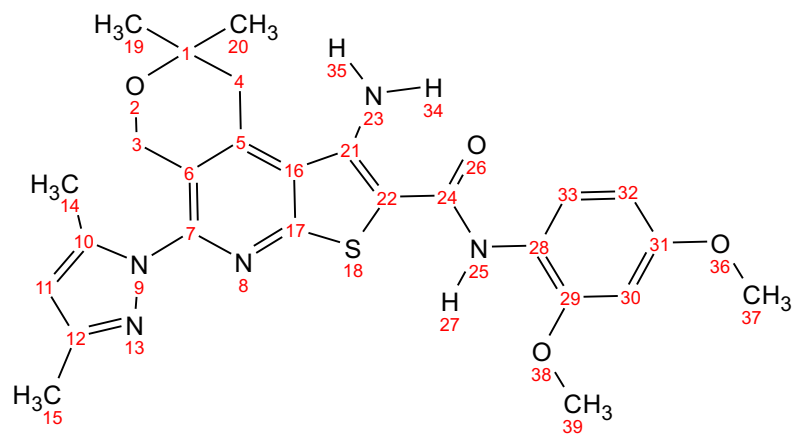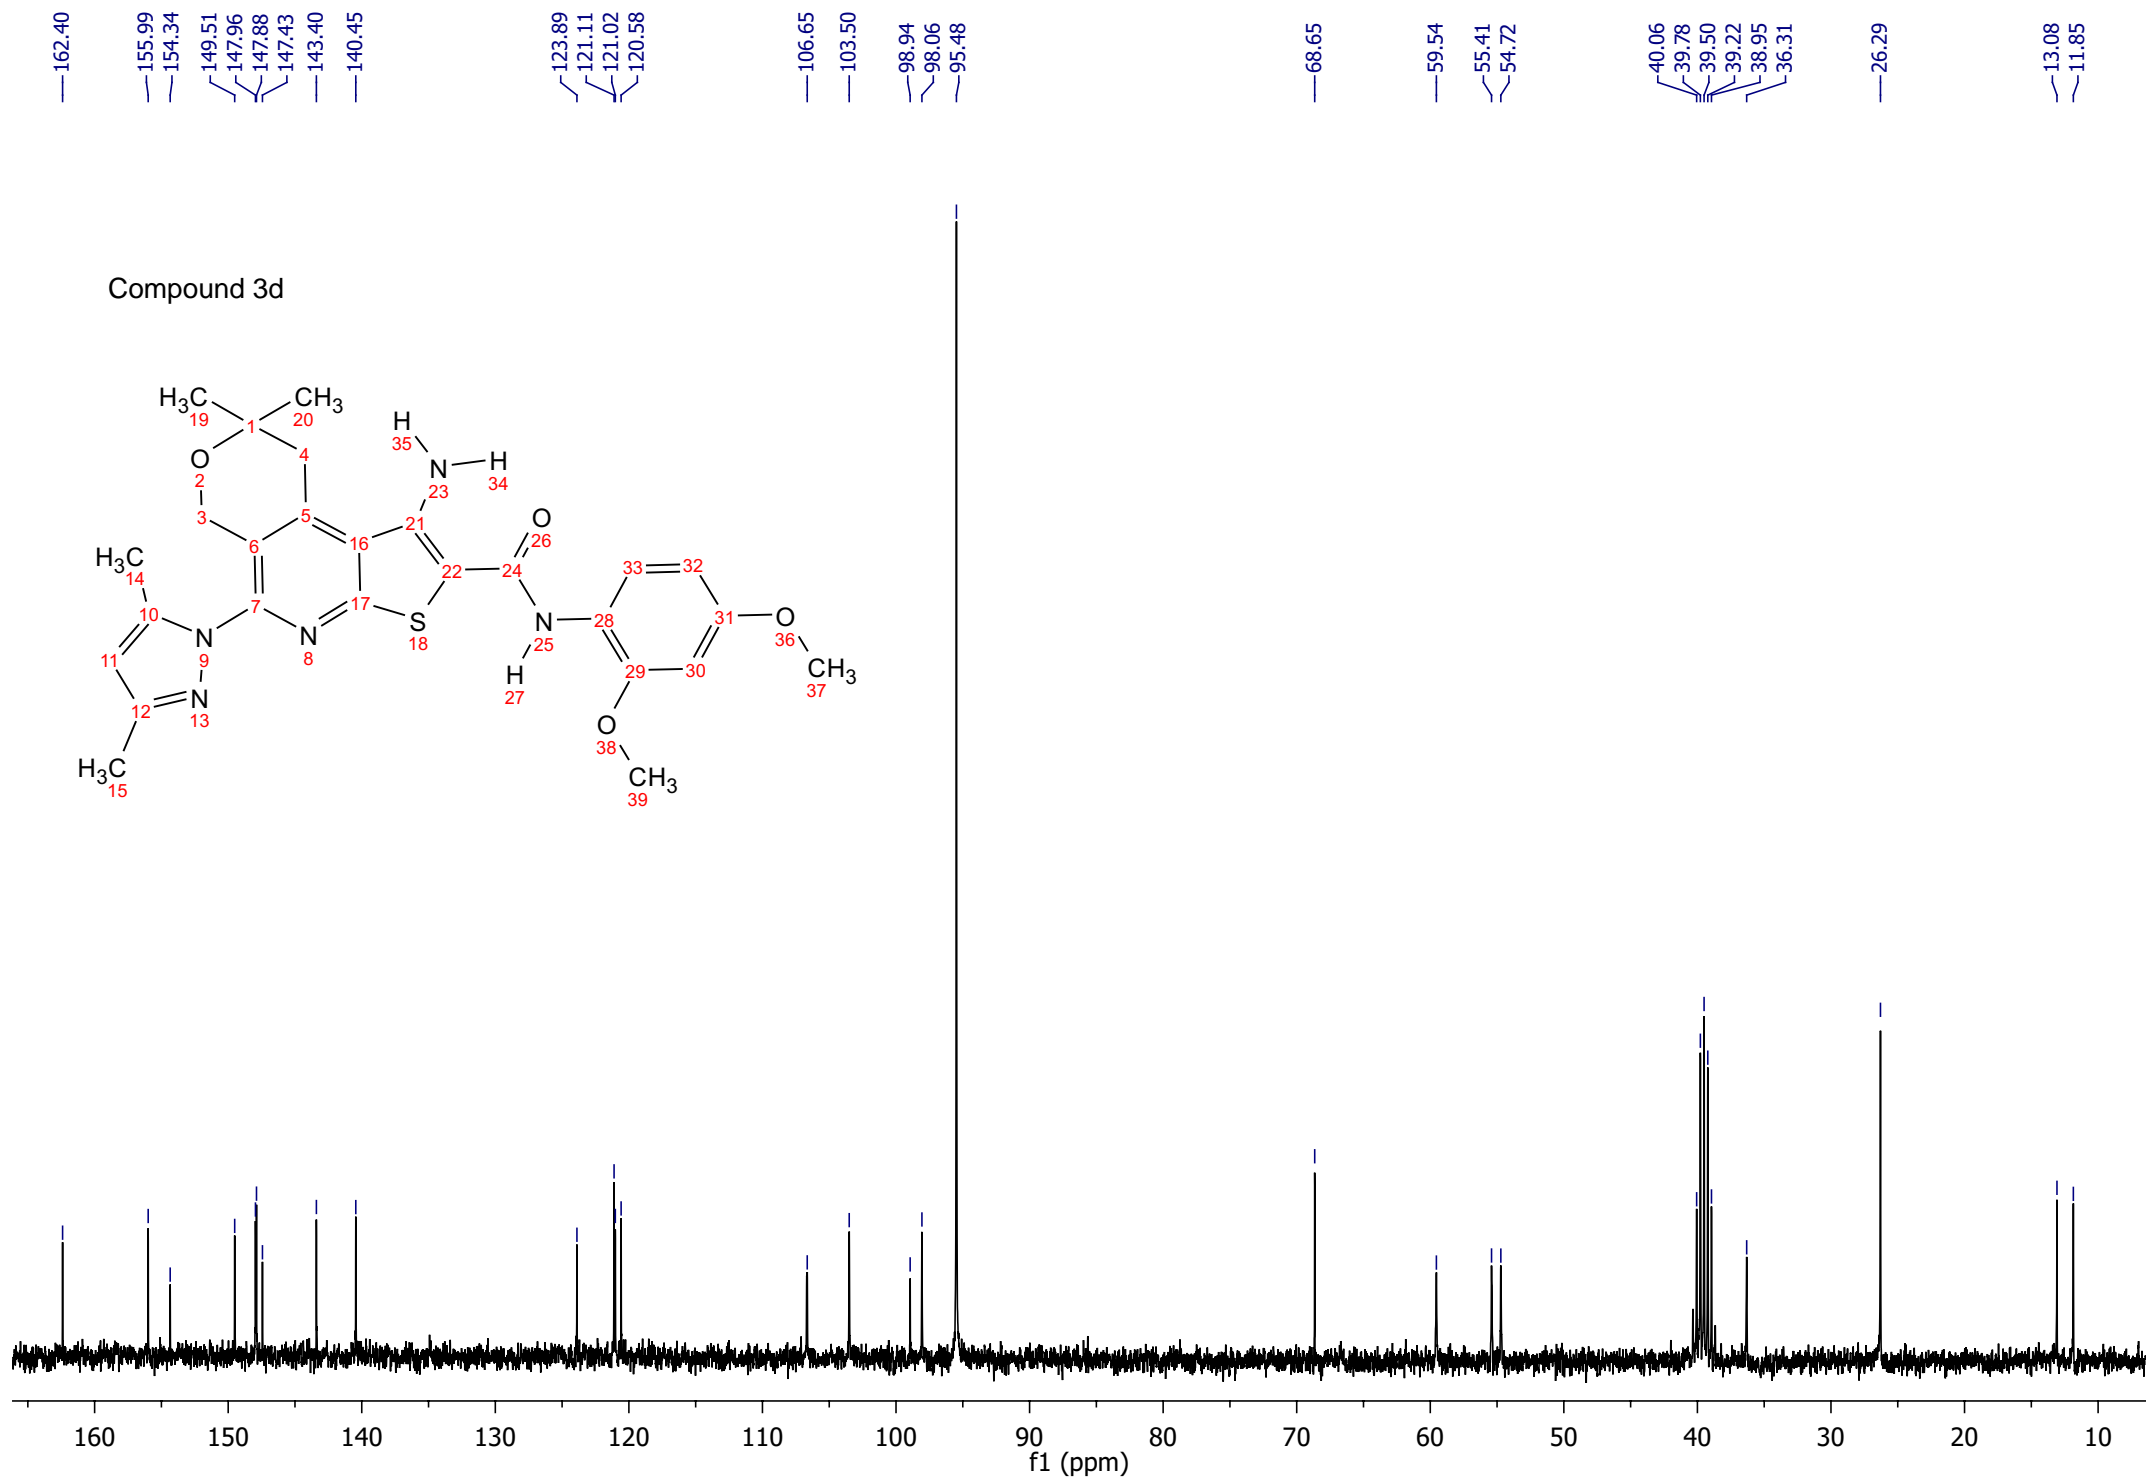

Supplement: s1 [file s1]

Compound 4e

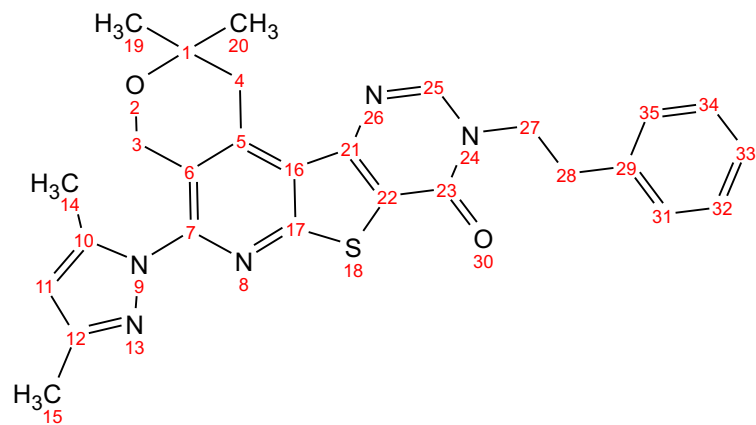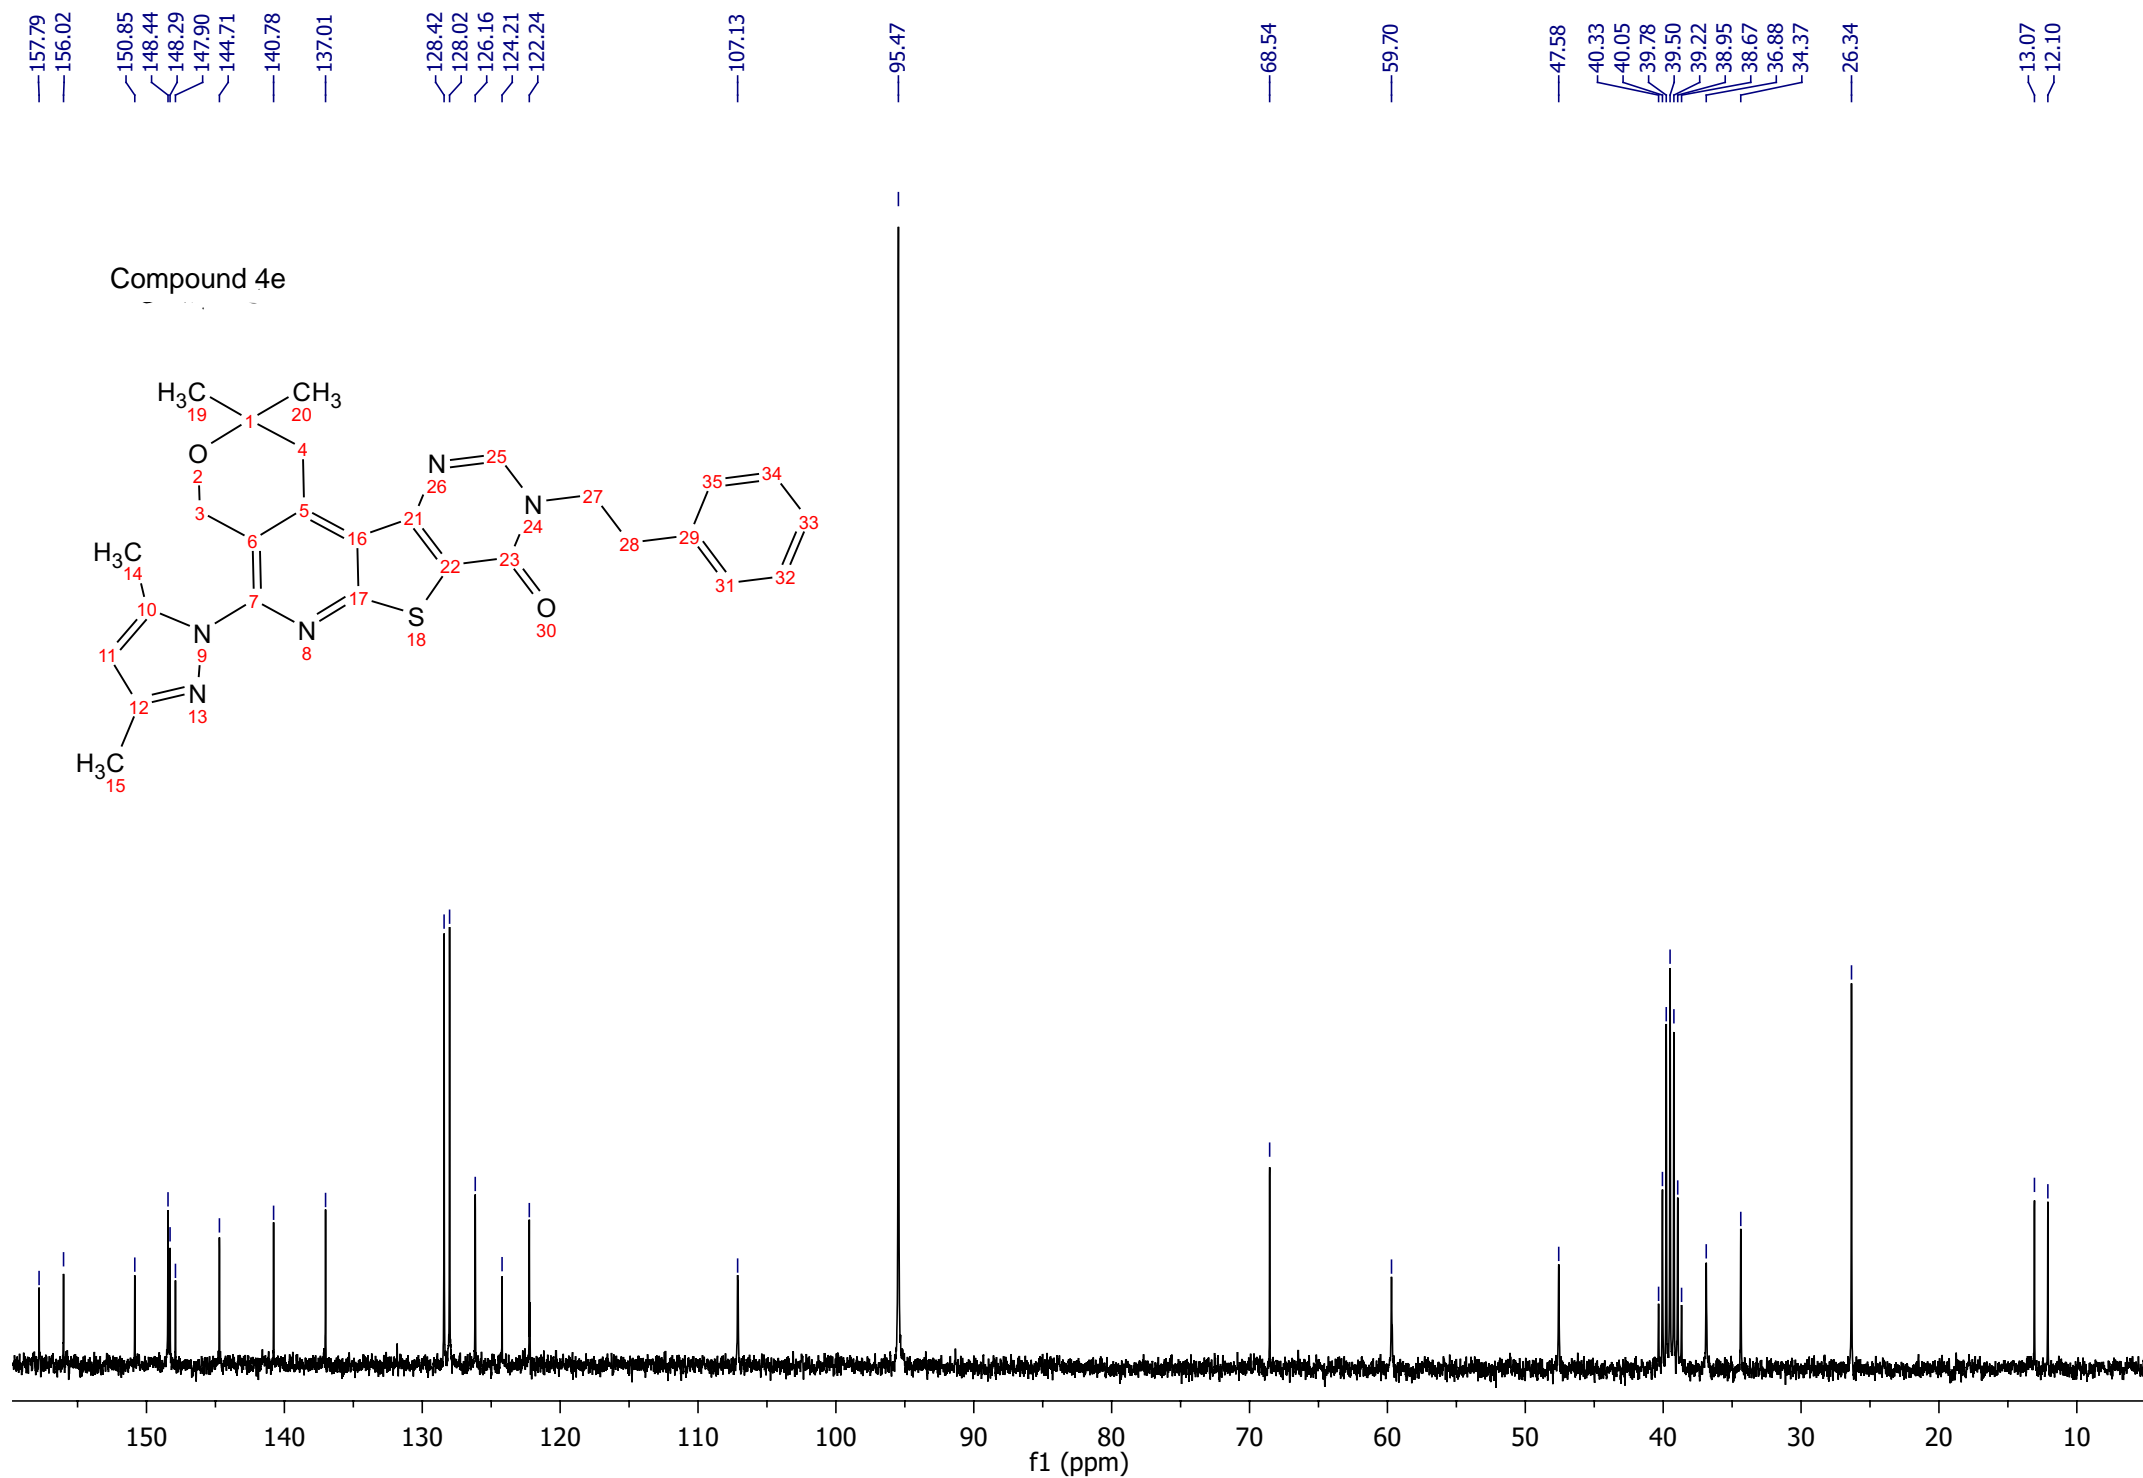

Supplement: s1 [file s1]

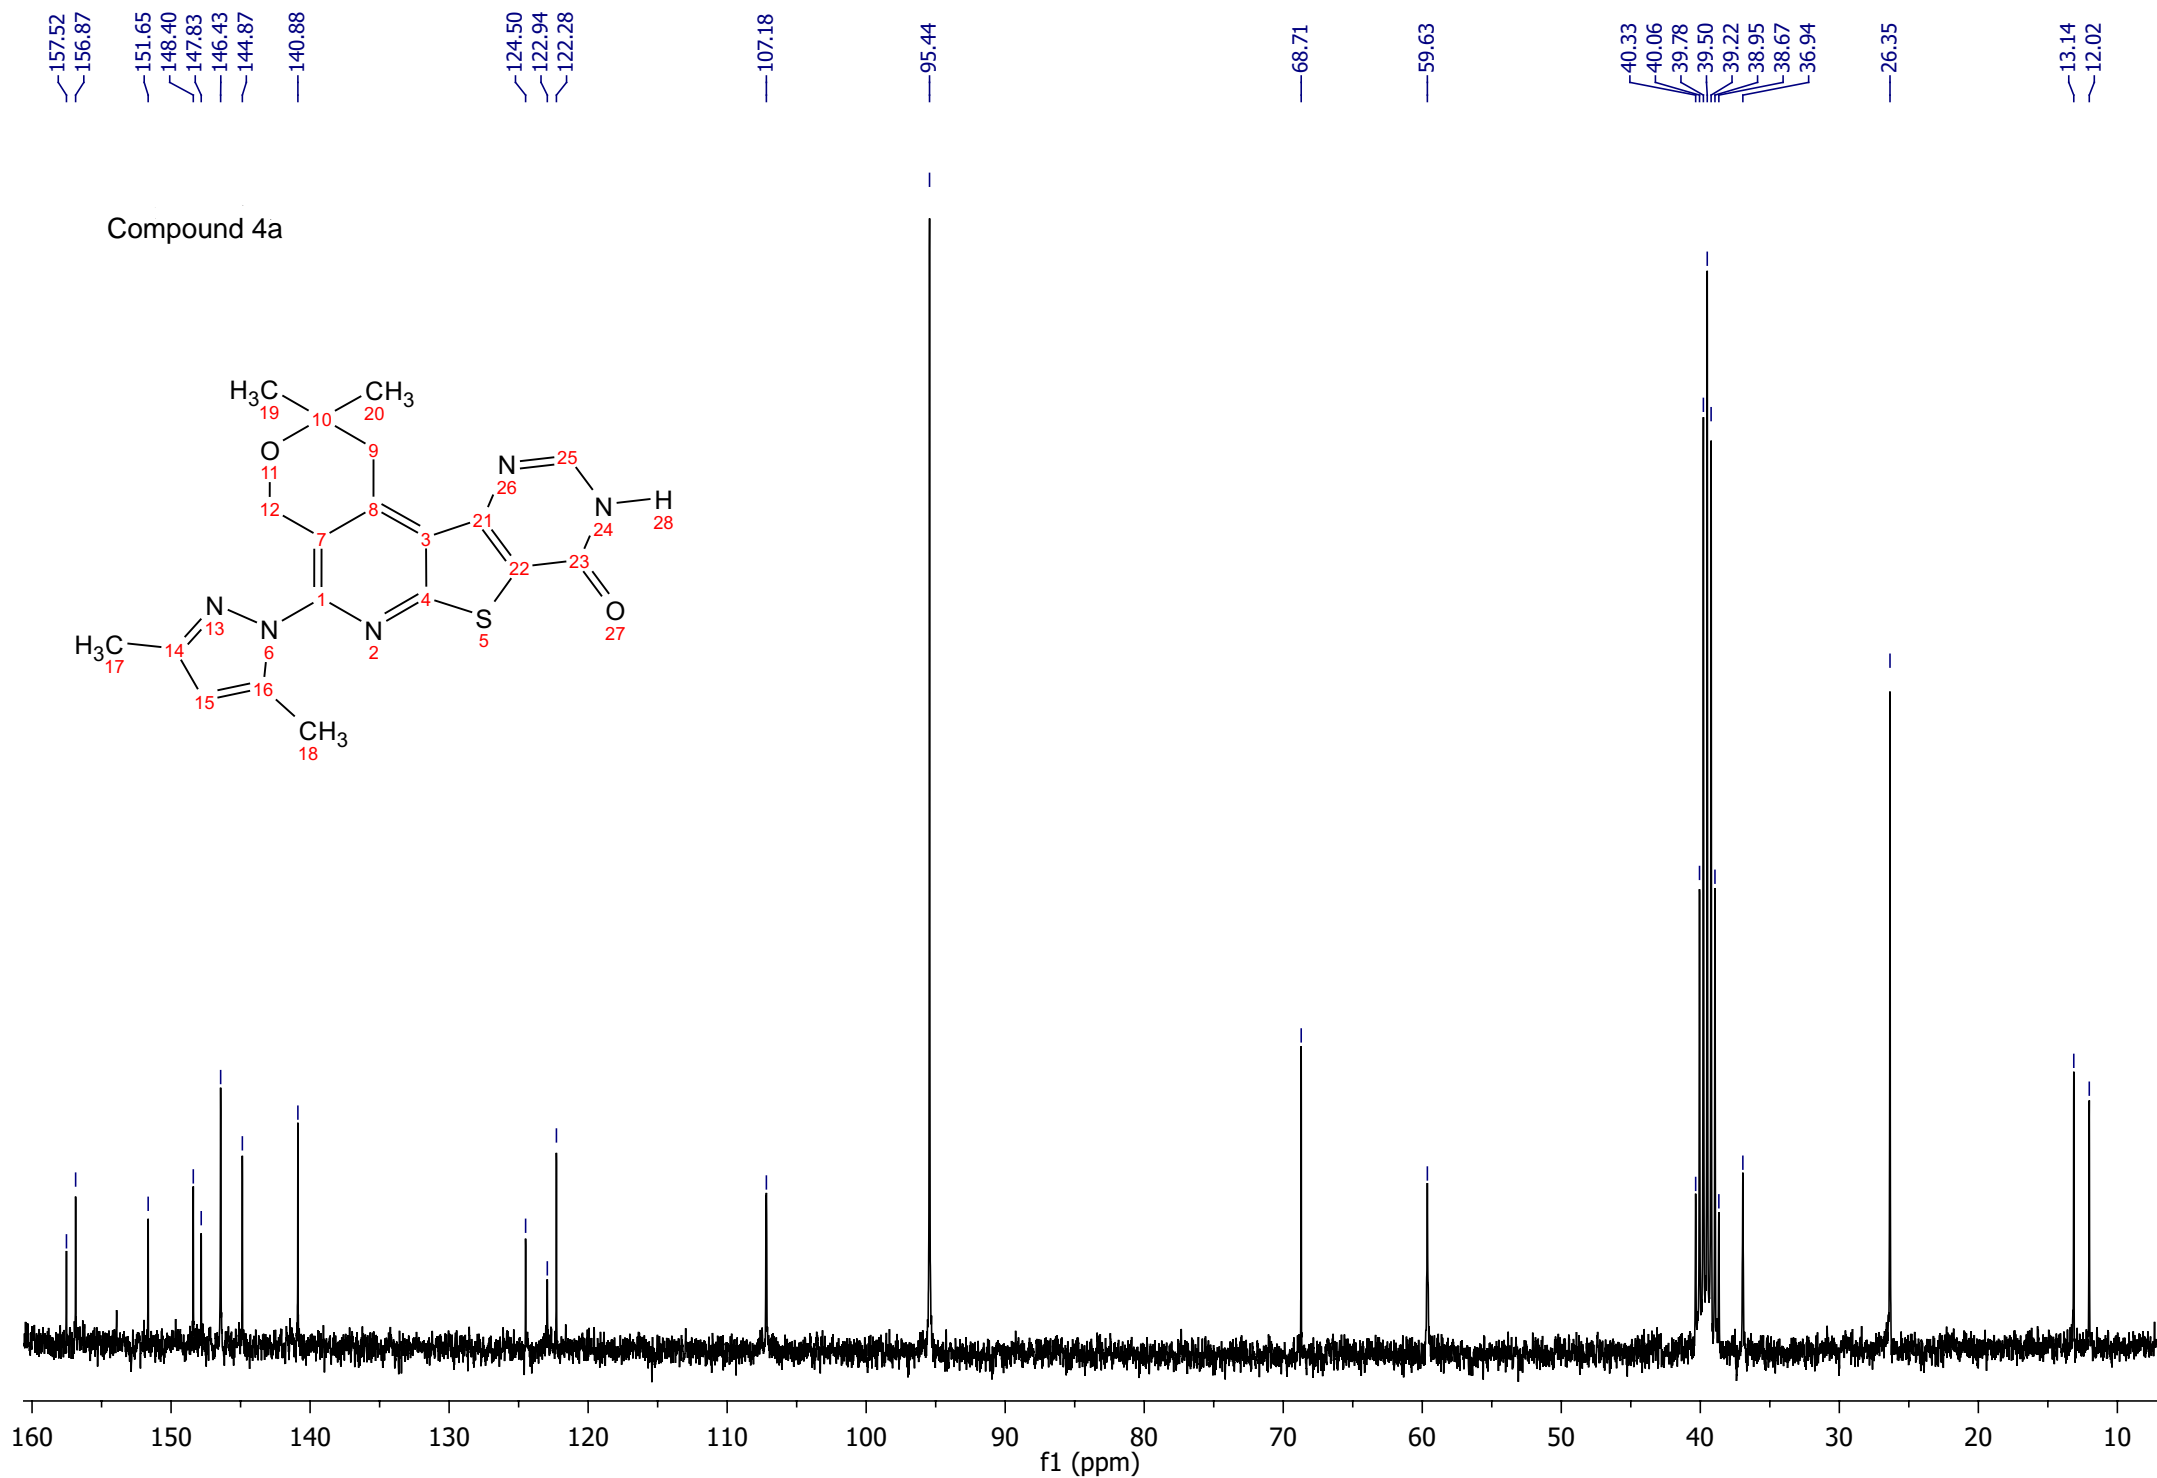

Supplement: s1 [file s1]

Compound 4e

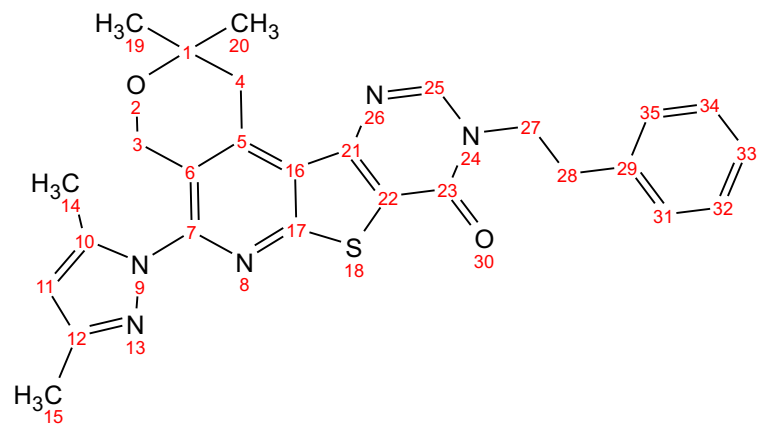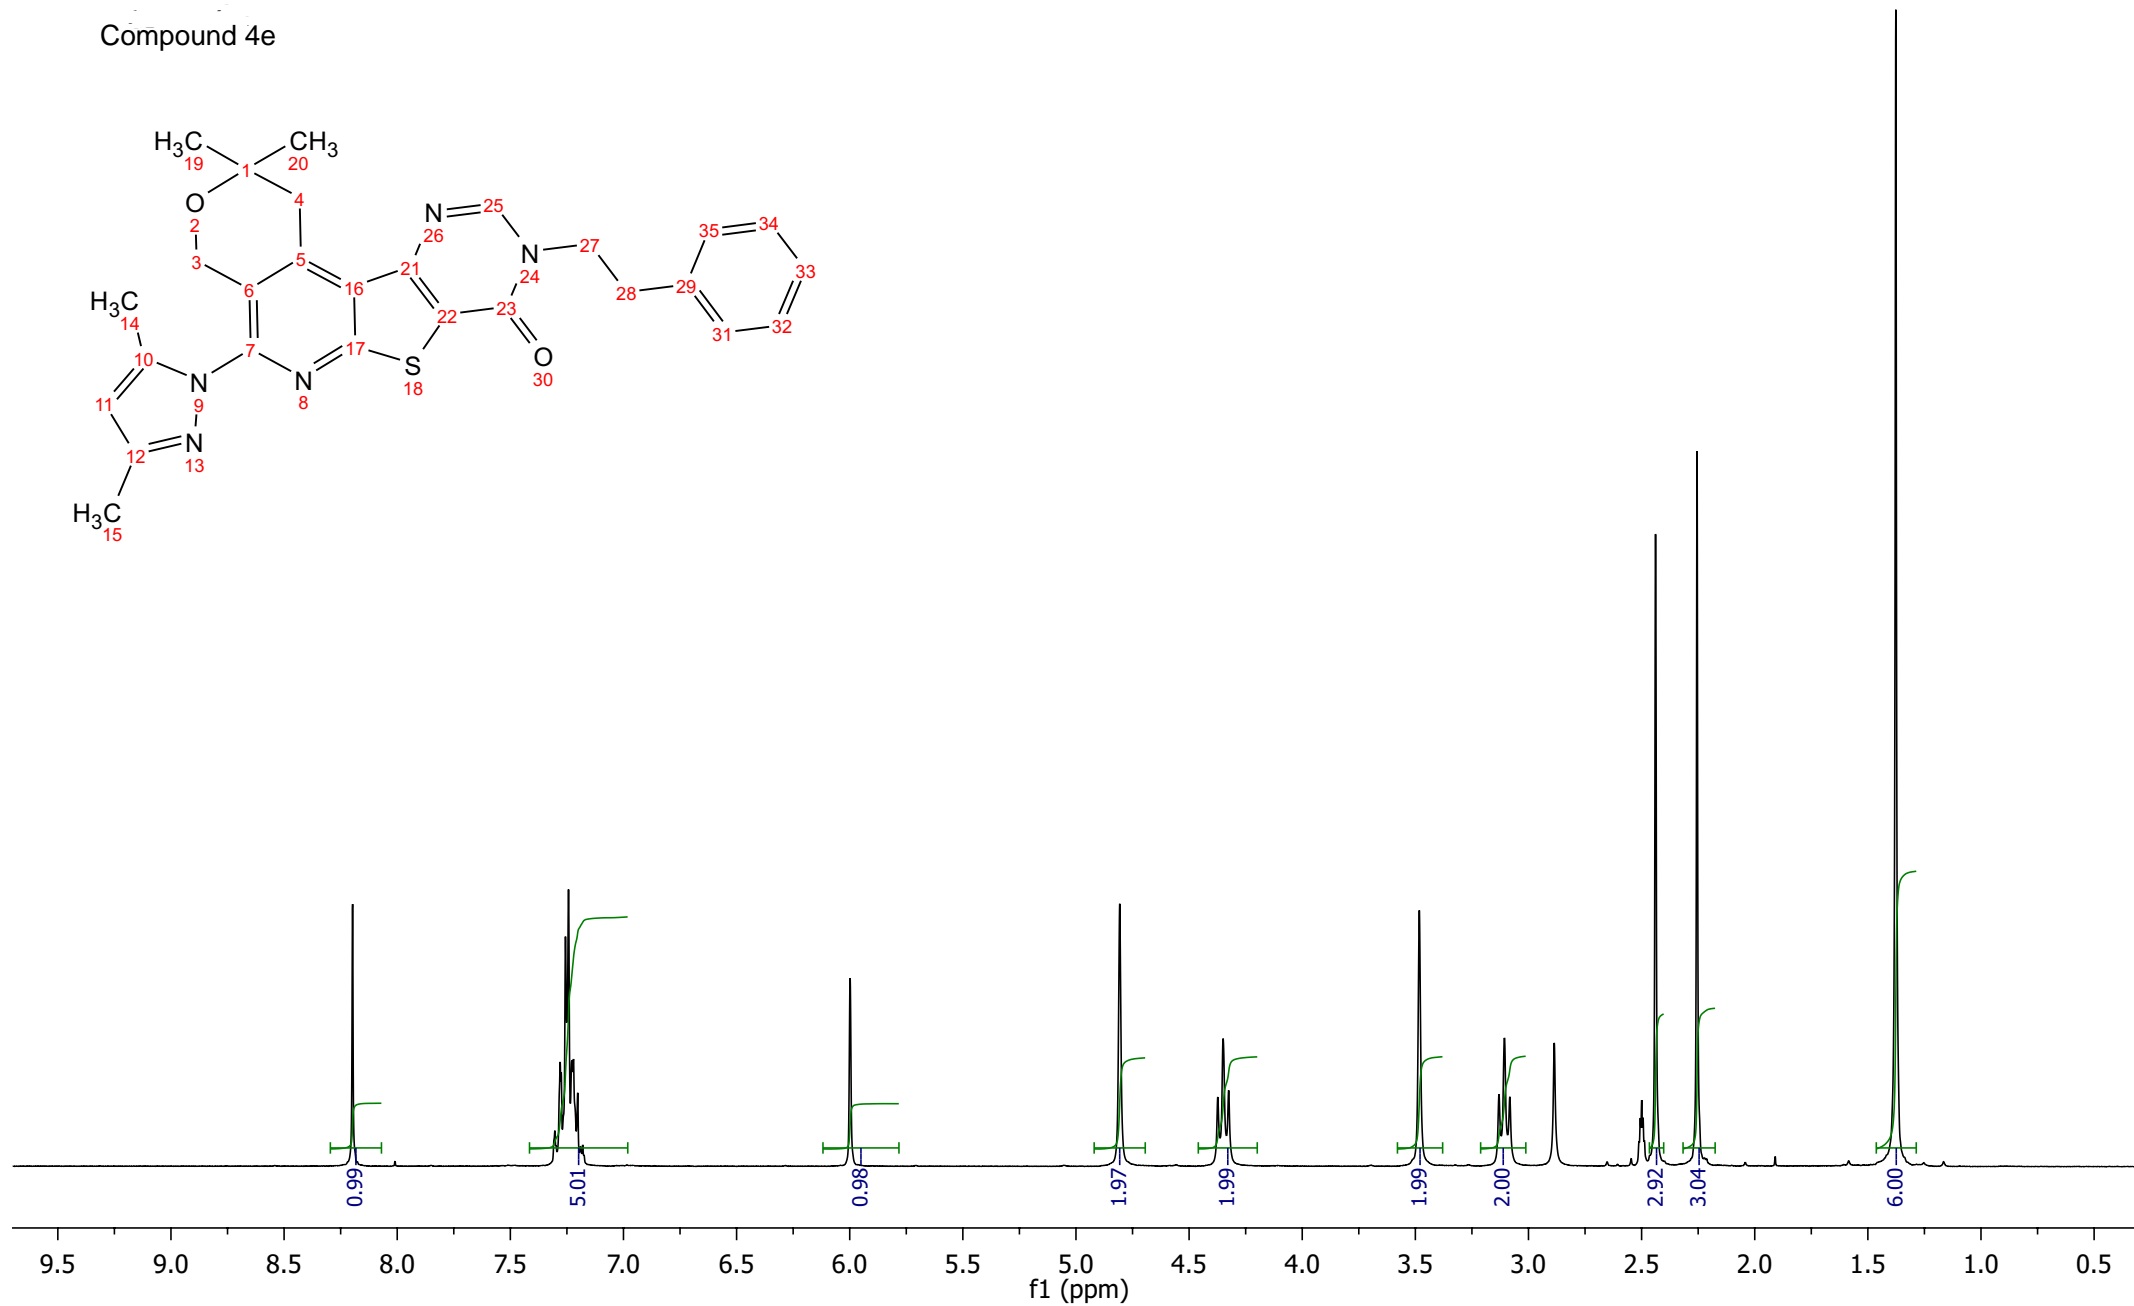

Supplement: s1 [file s1]

Compound 3e

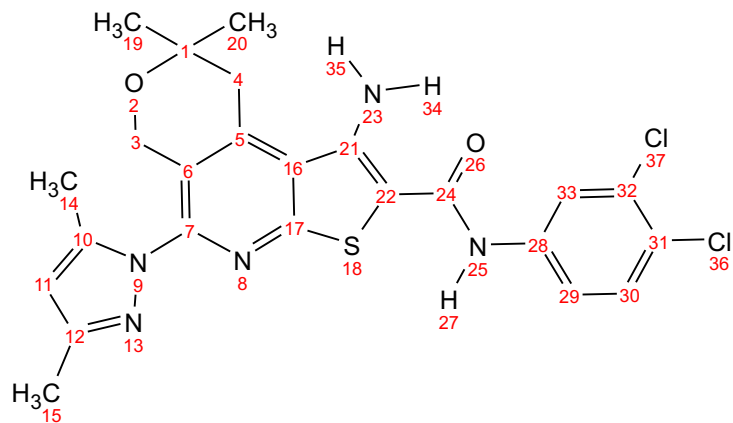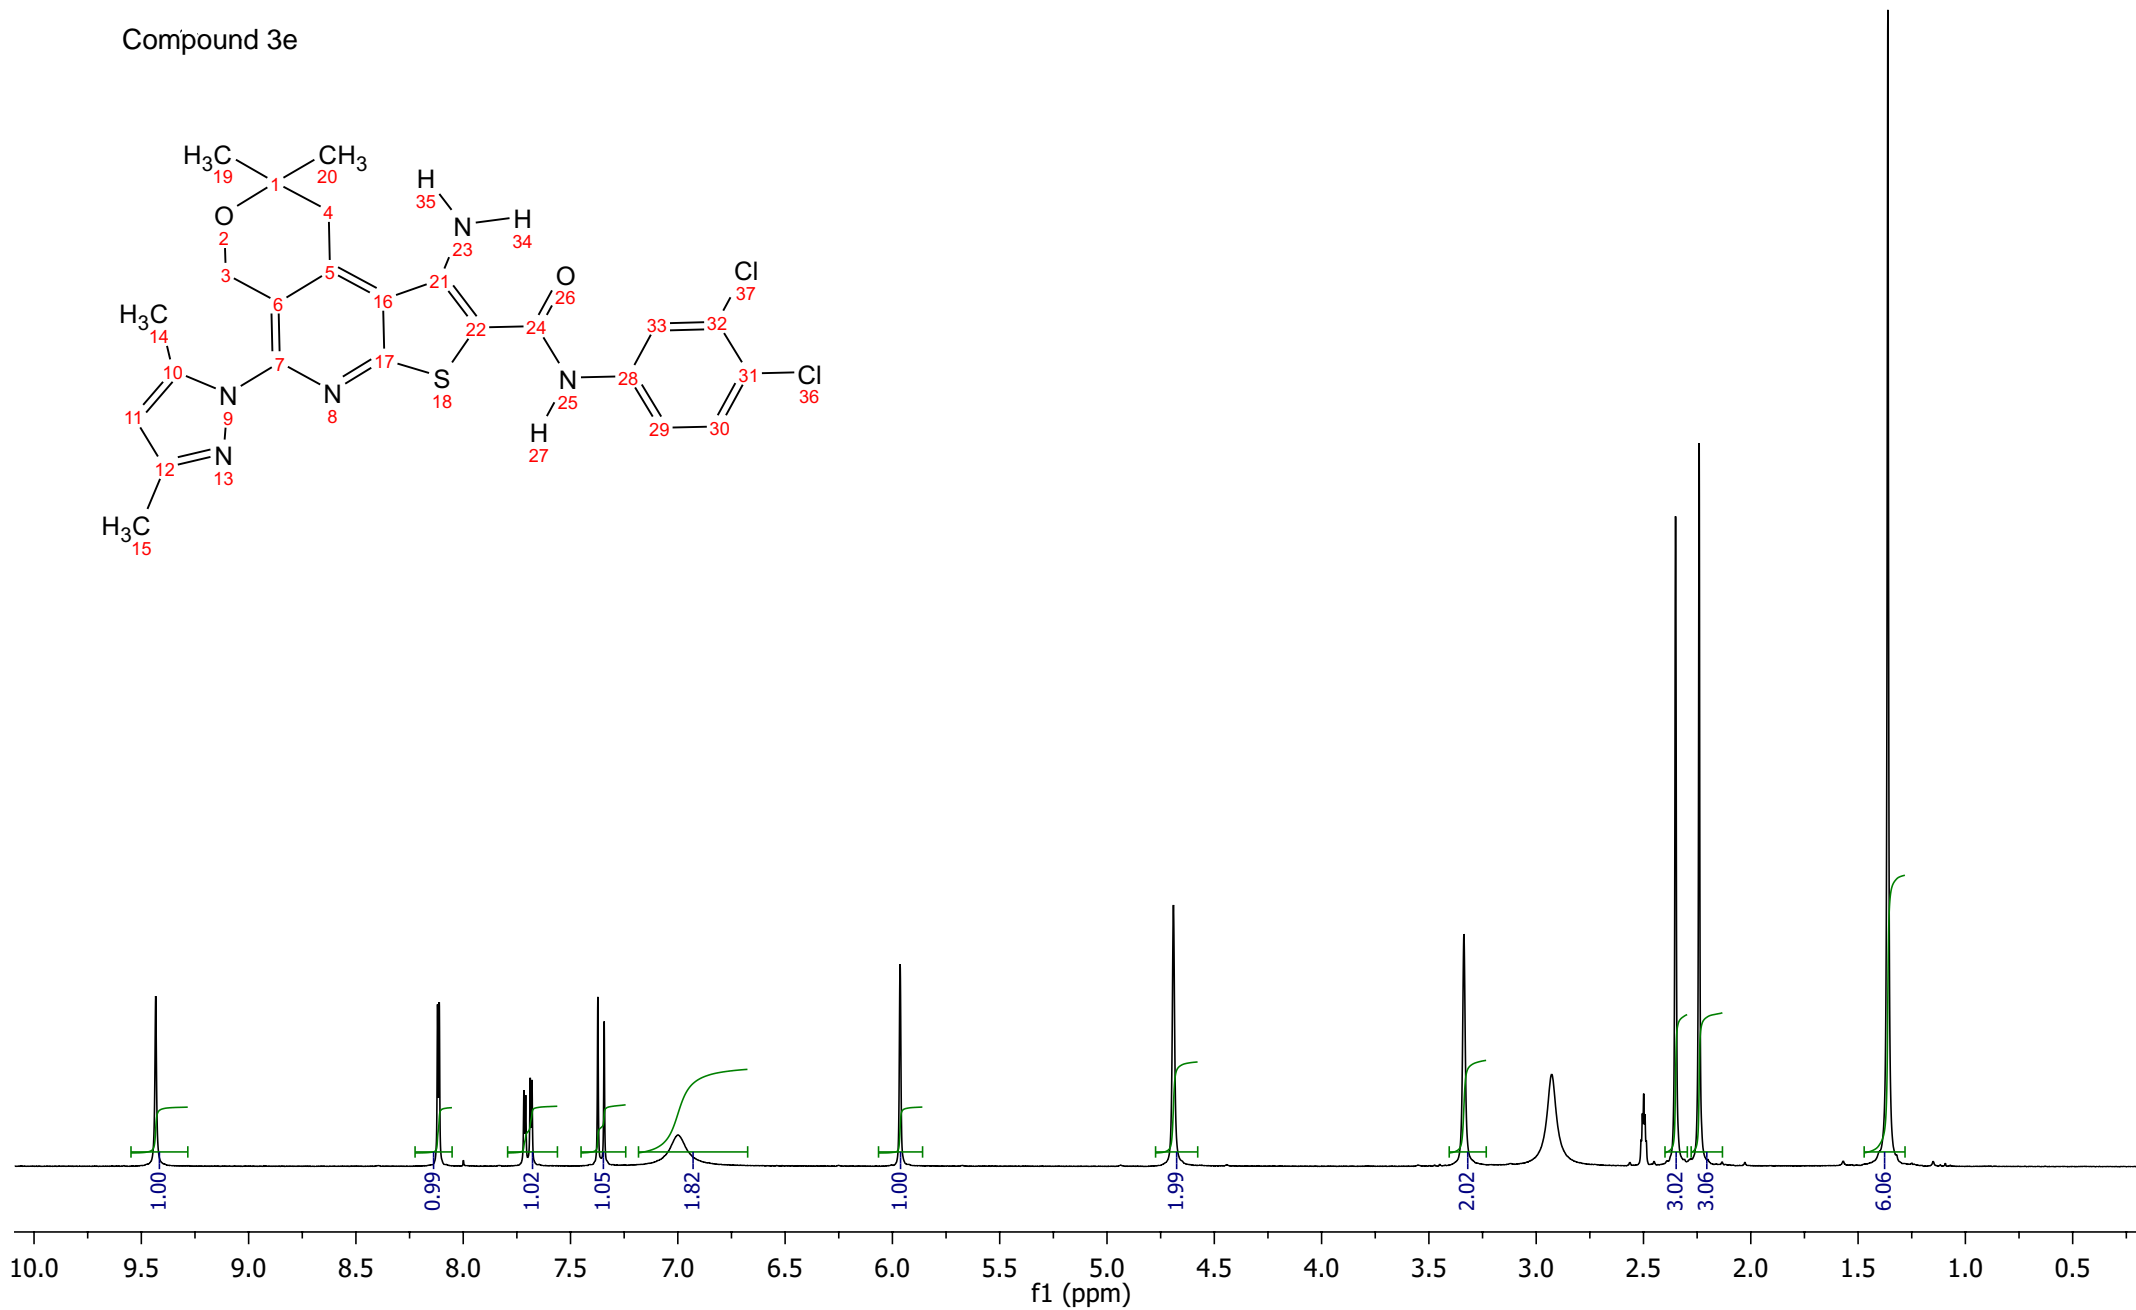

Supplement: s1 [file s1]

Compound 3a

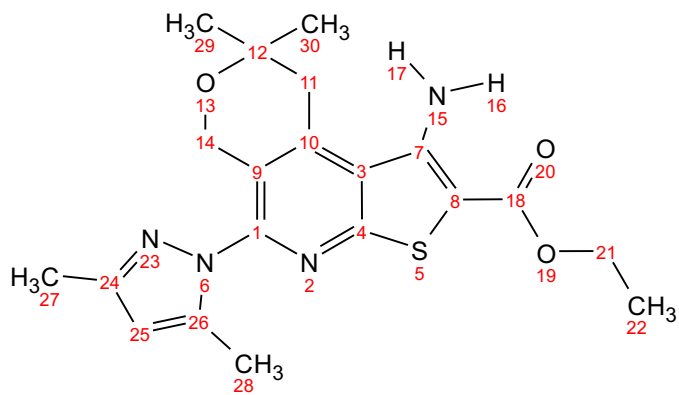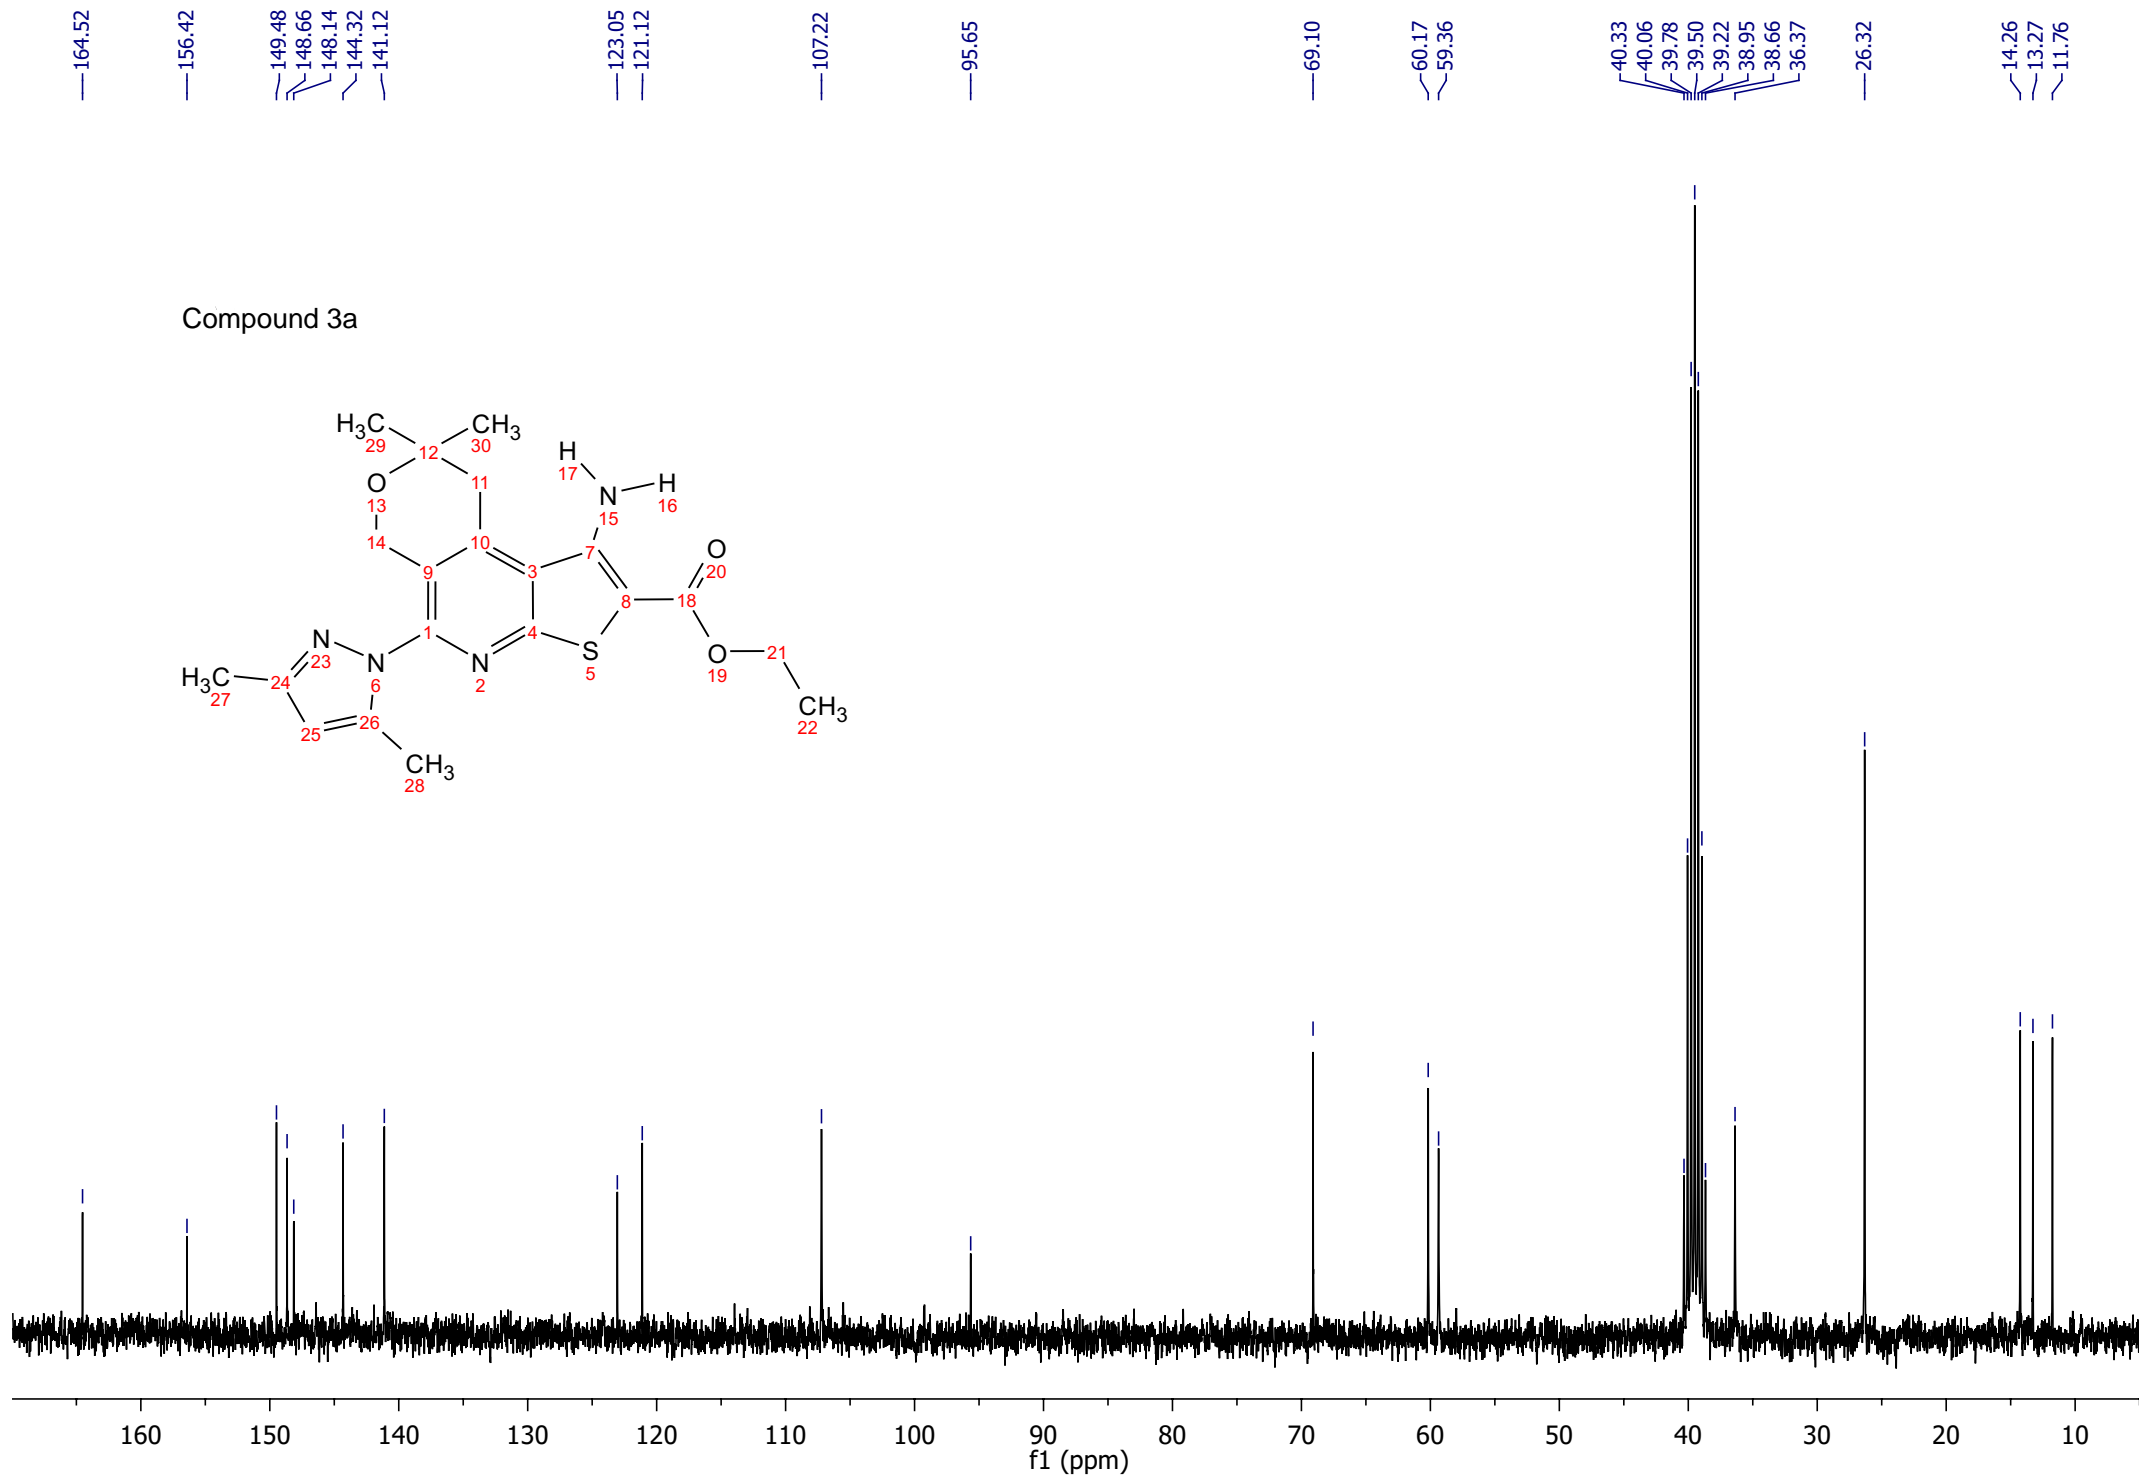

Supplement: s1 [file s1]

Compound 4c

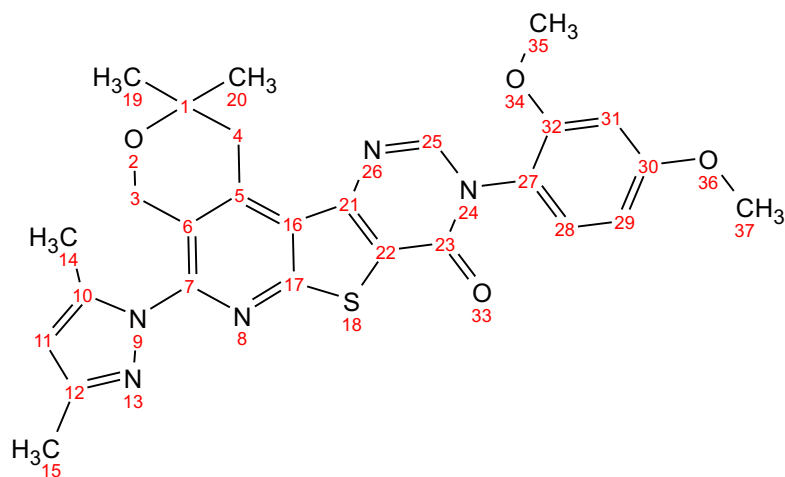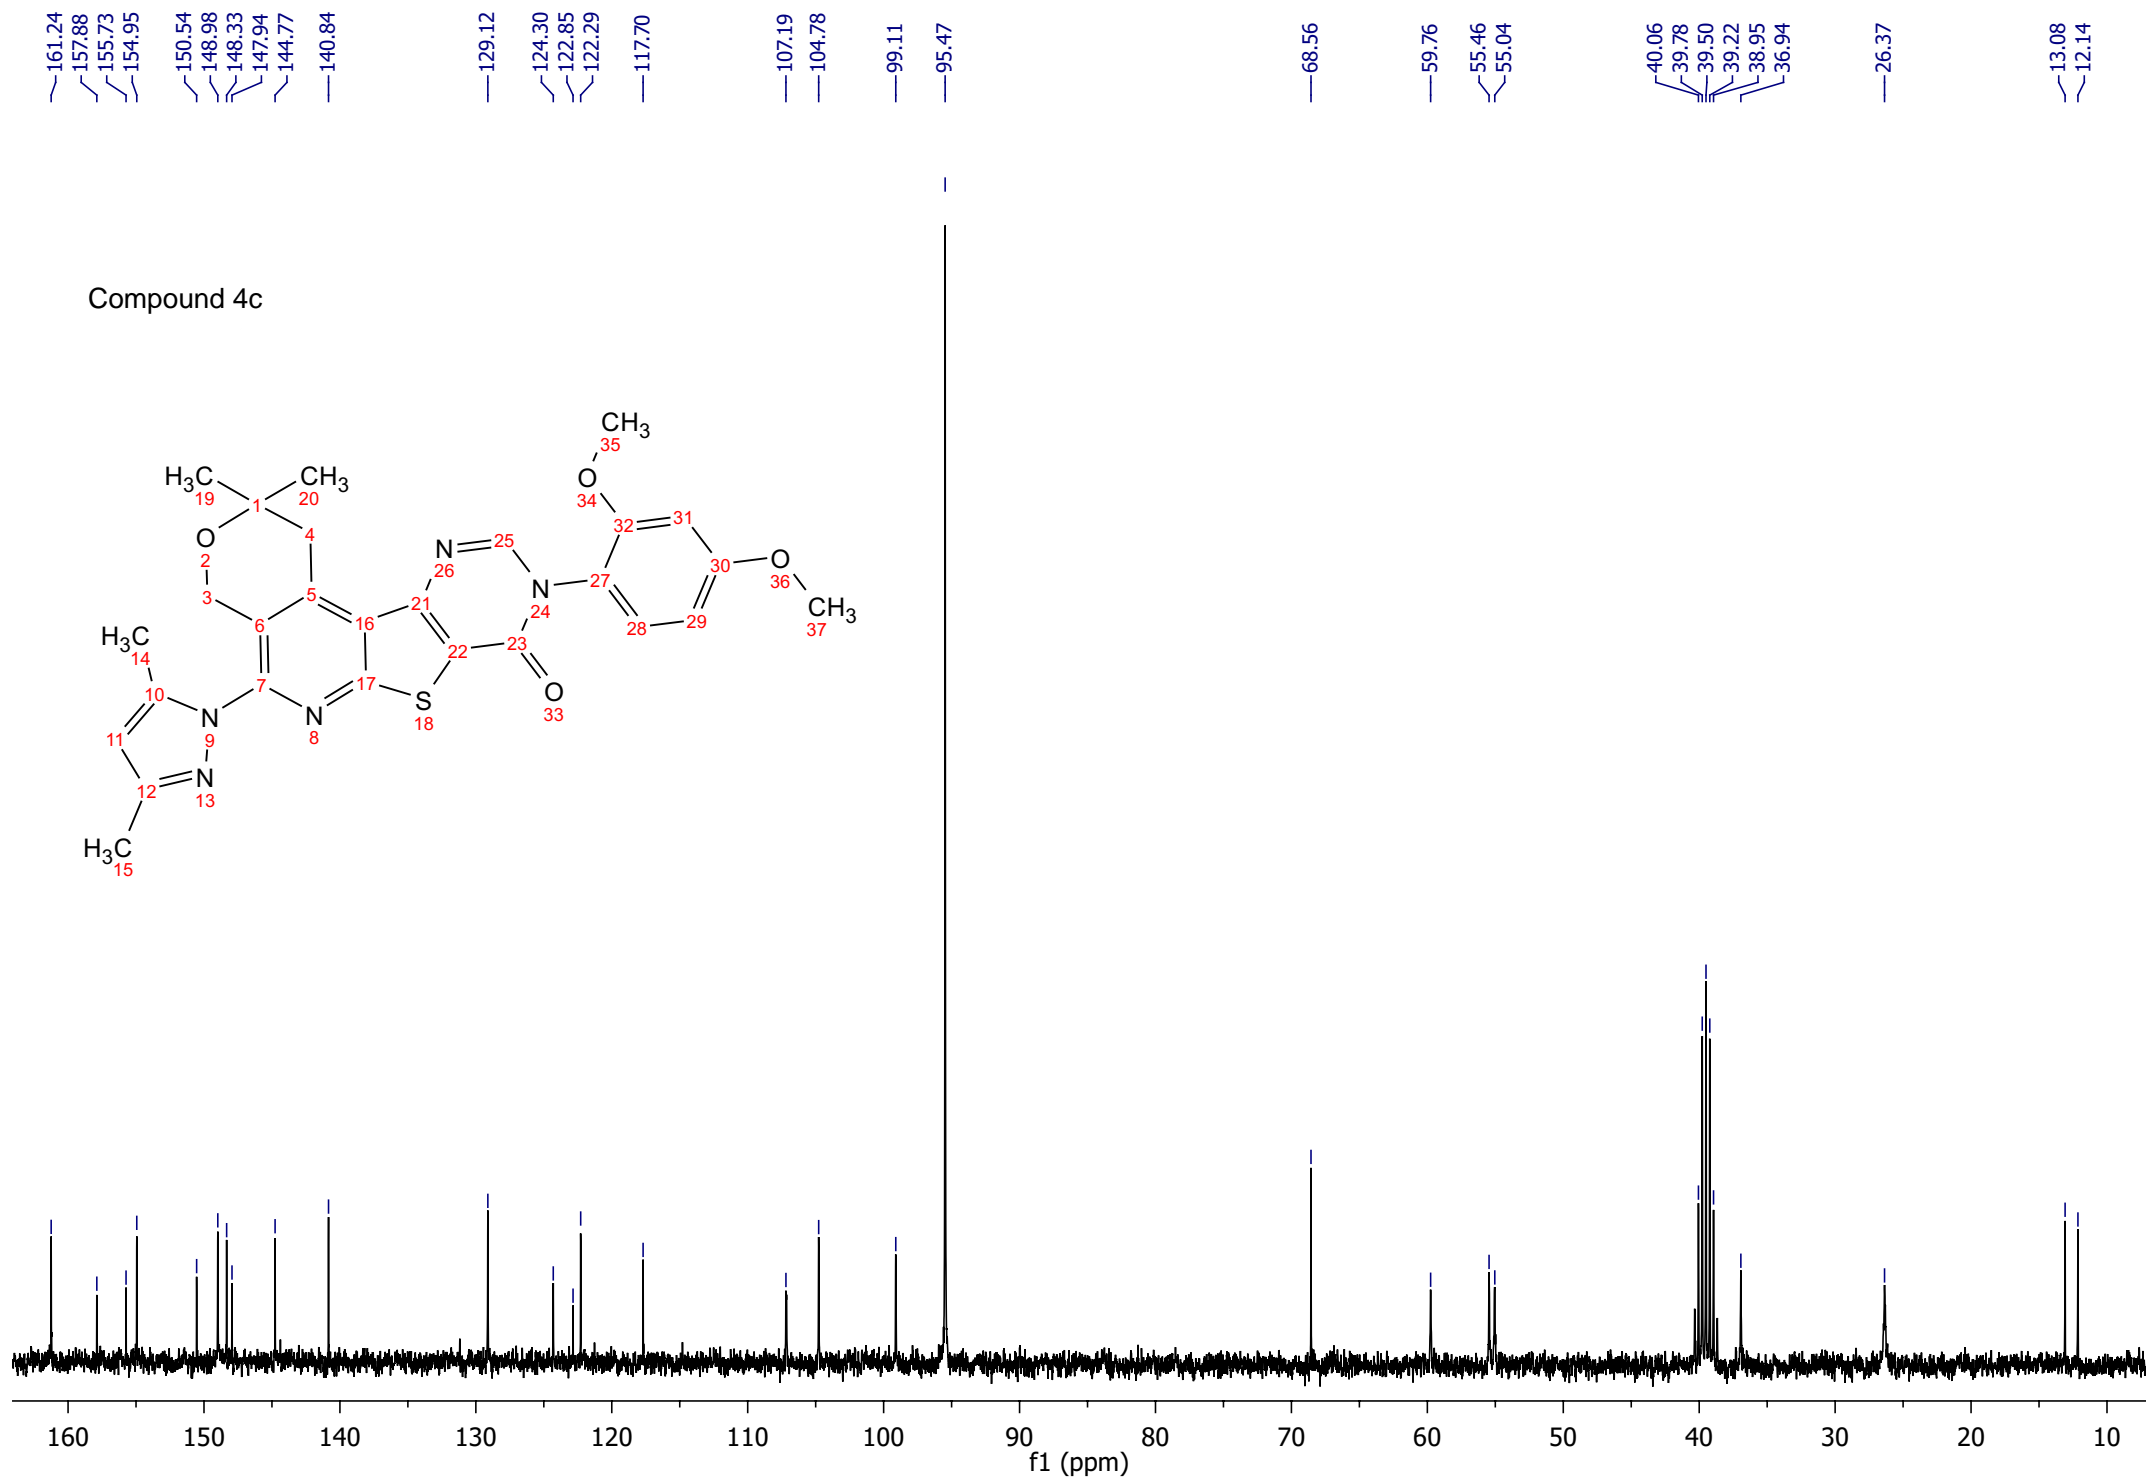

Supplement: s1 [file s1]

## Compound 3a

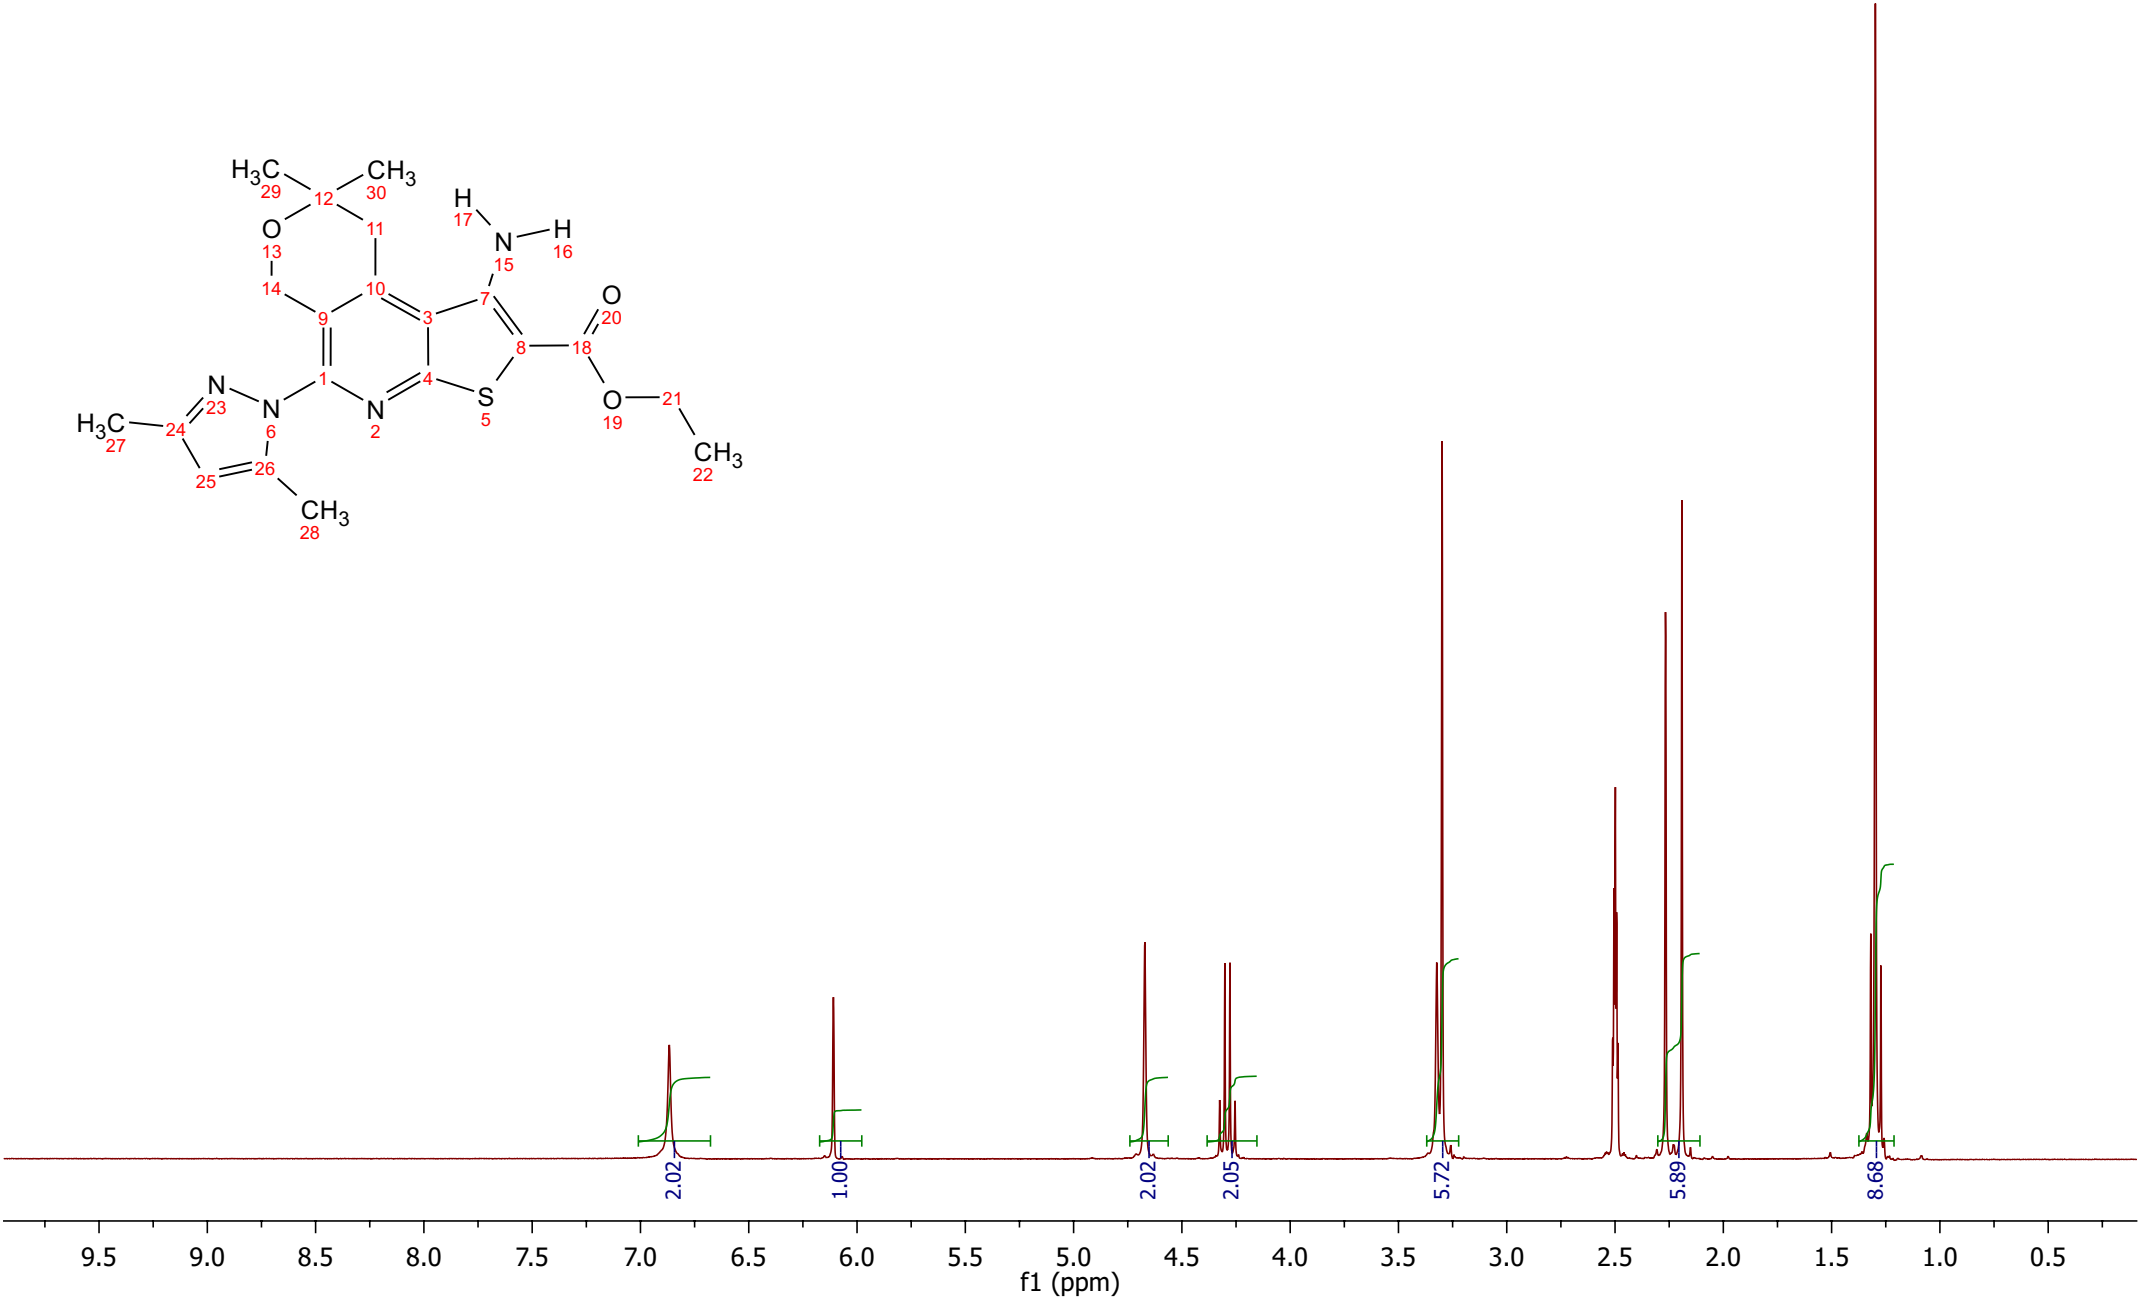

Supplement: s1 [file s1]

Compound 4c

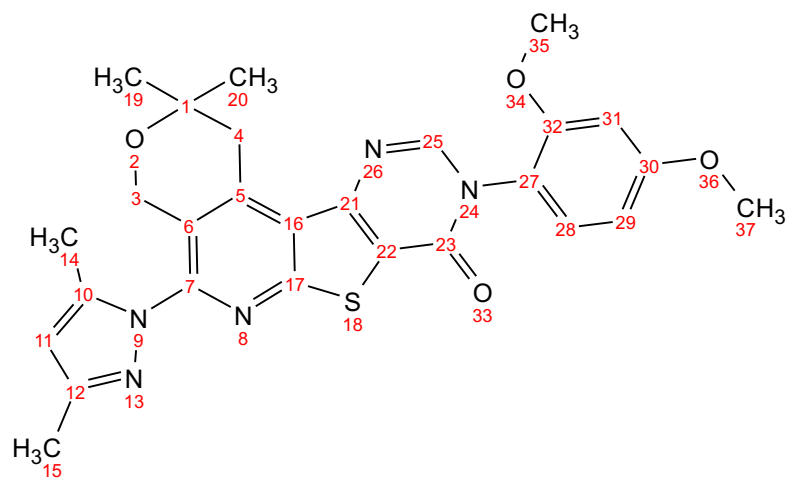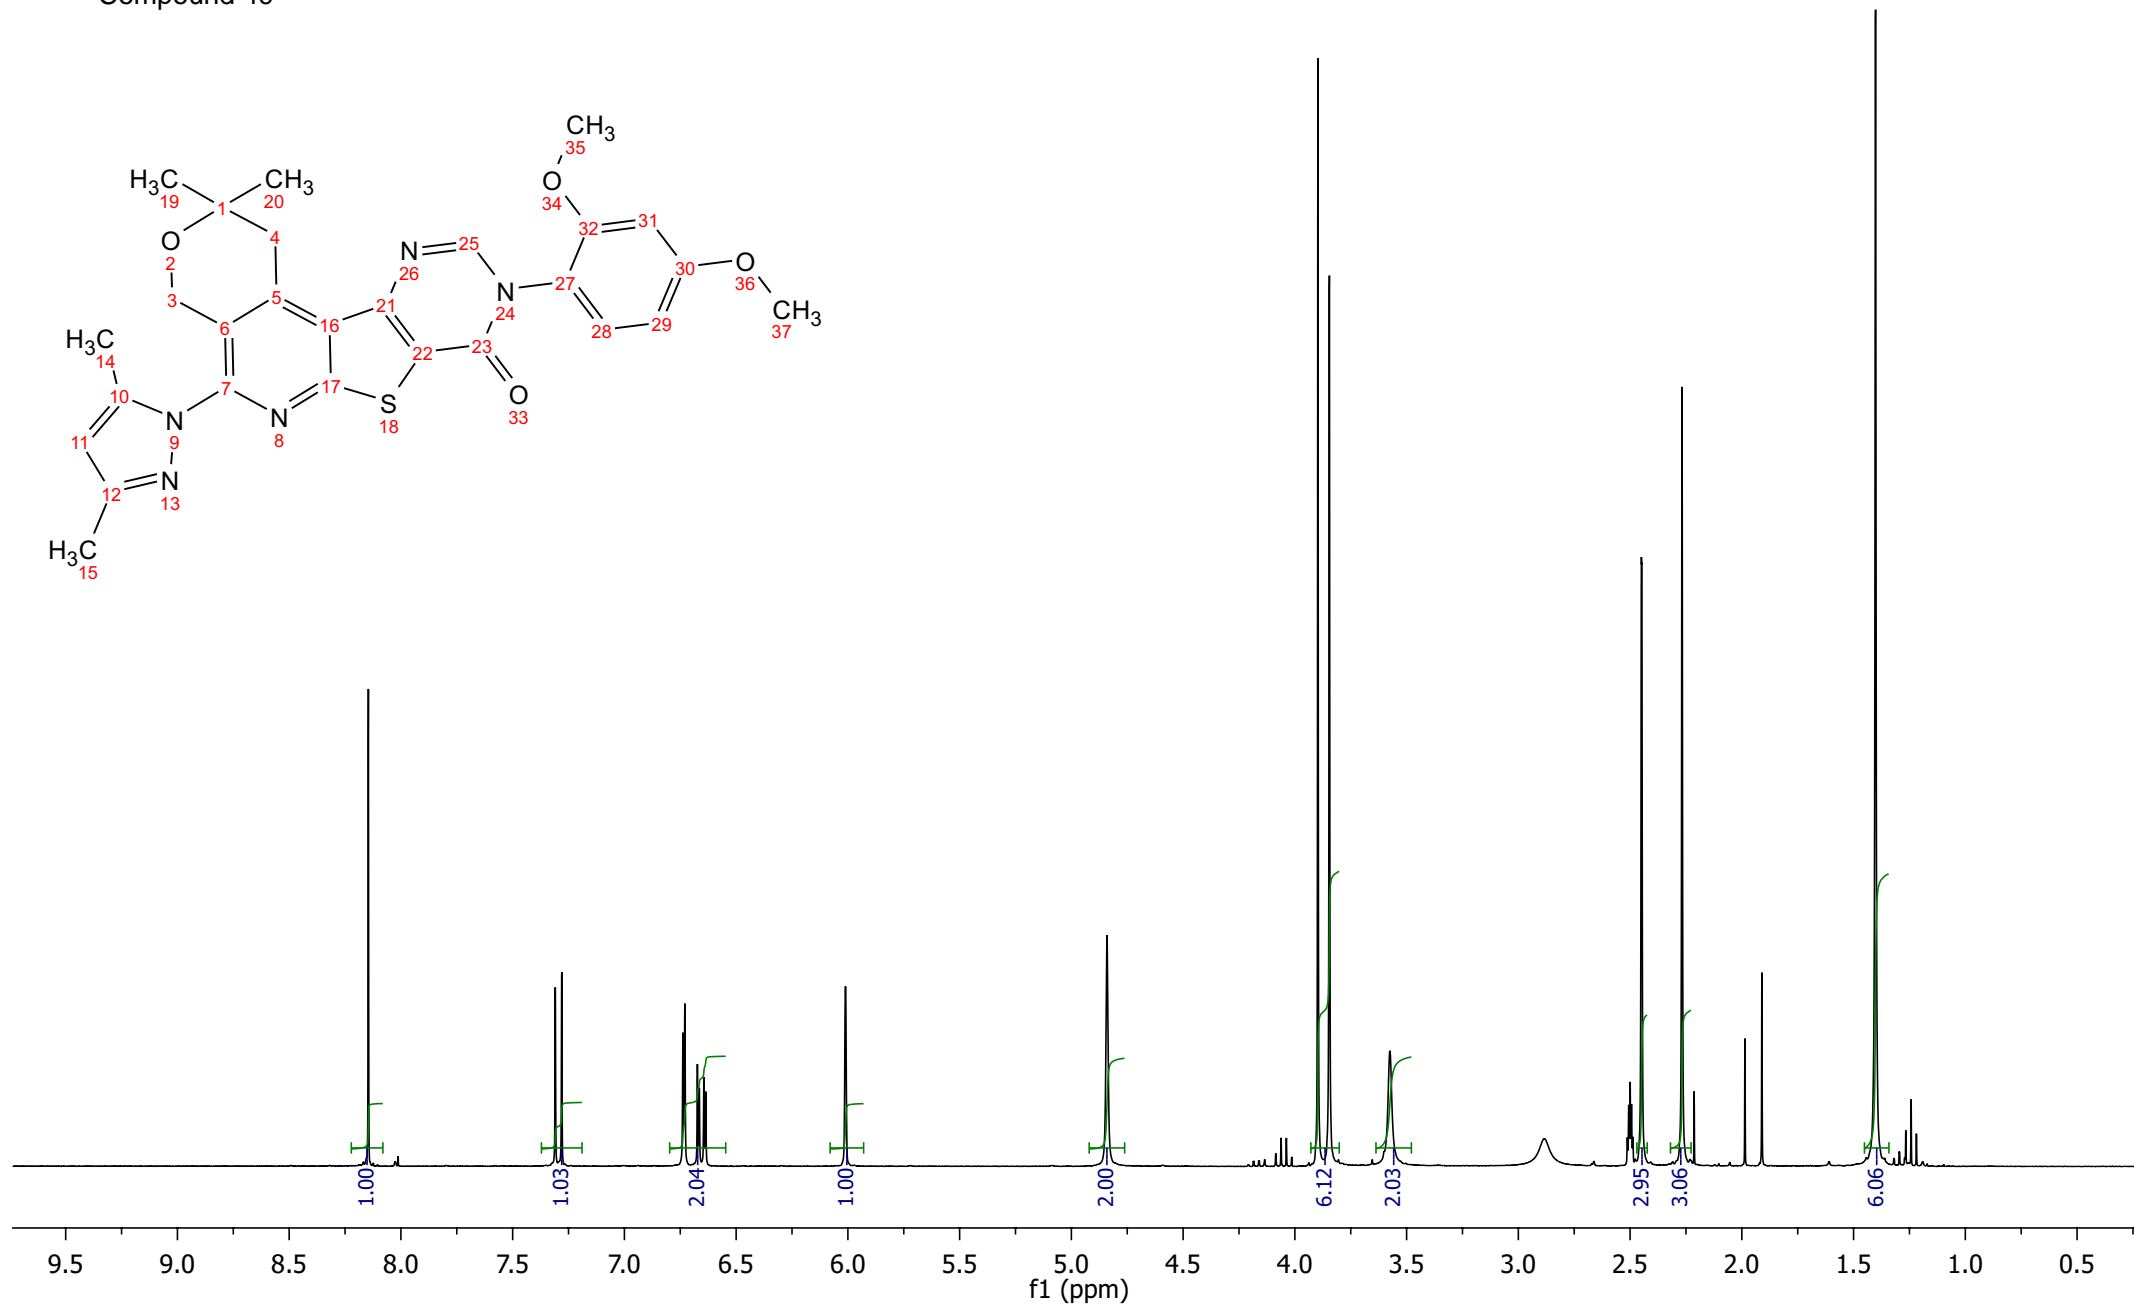

Supplement: s1 [file s1]

Compound 3f

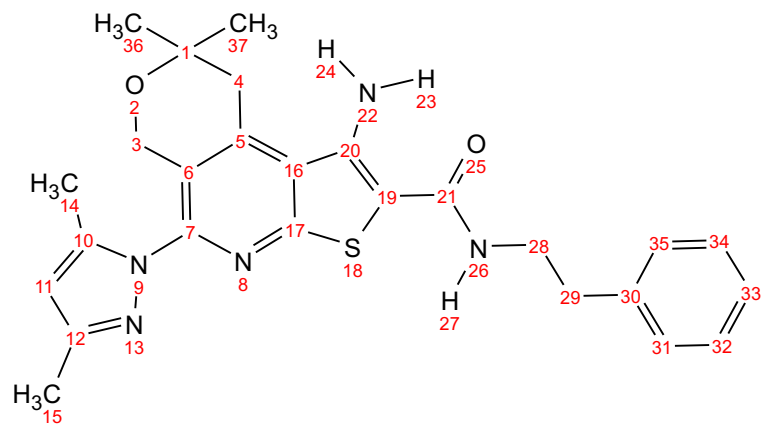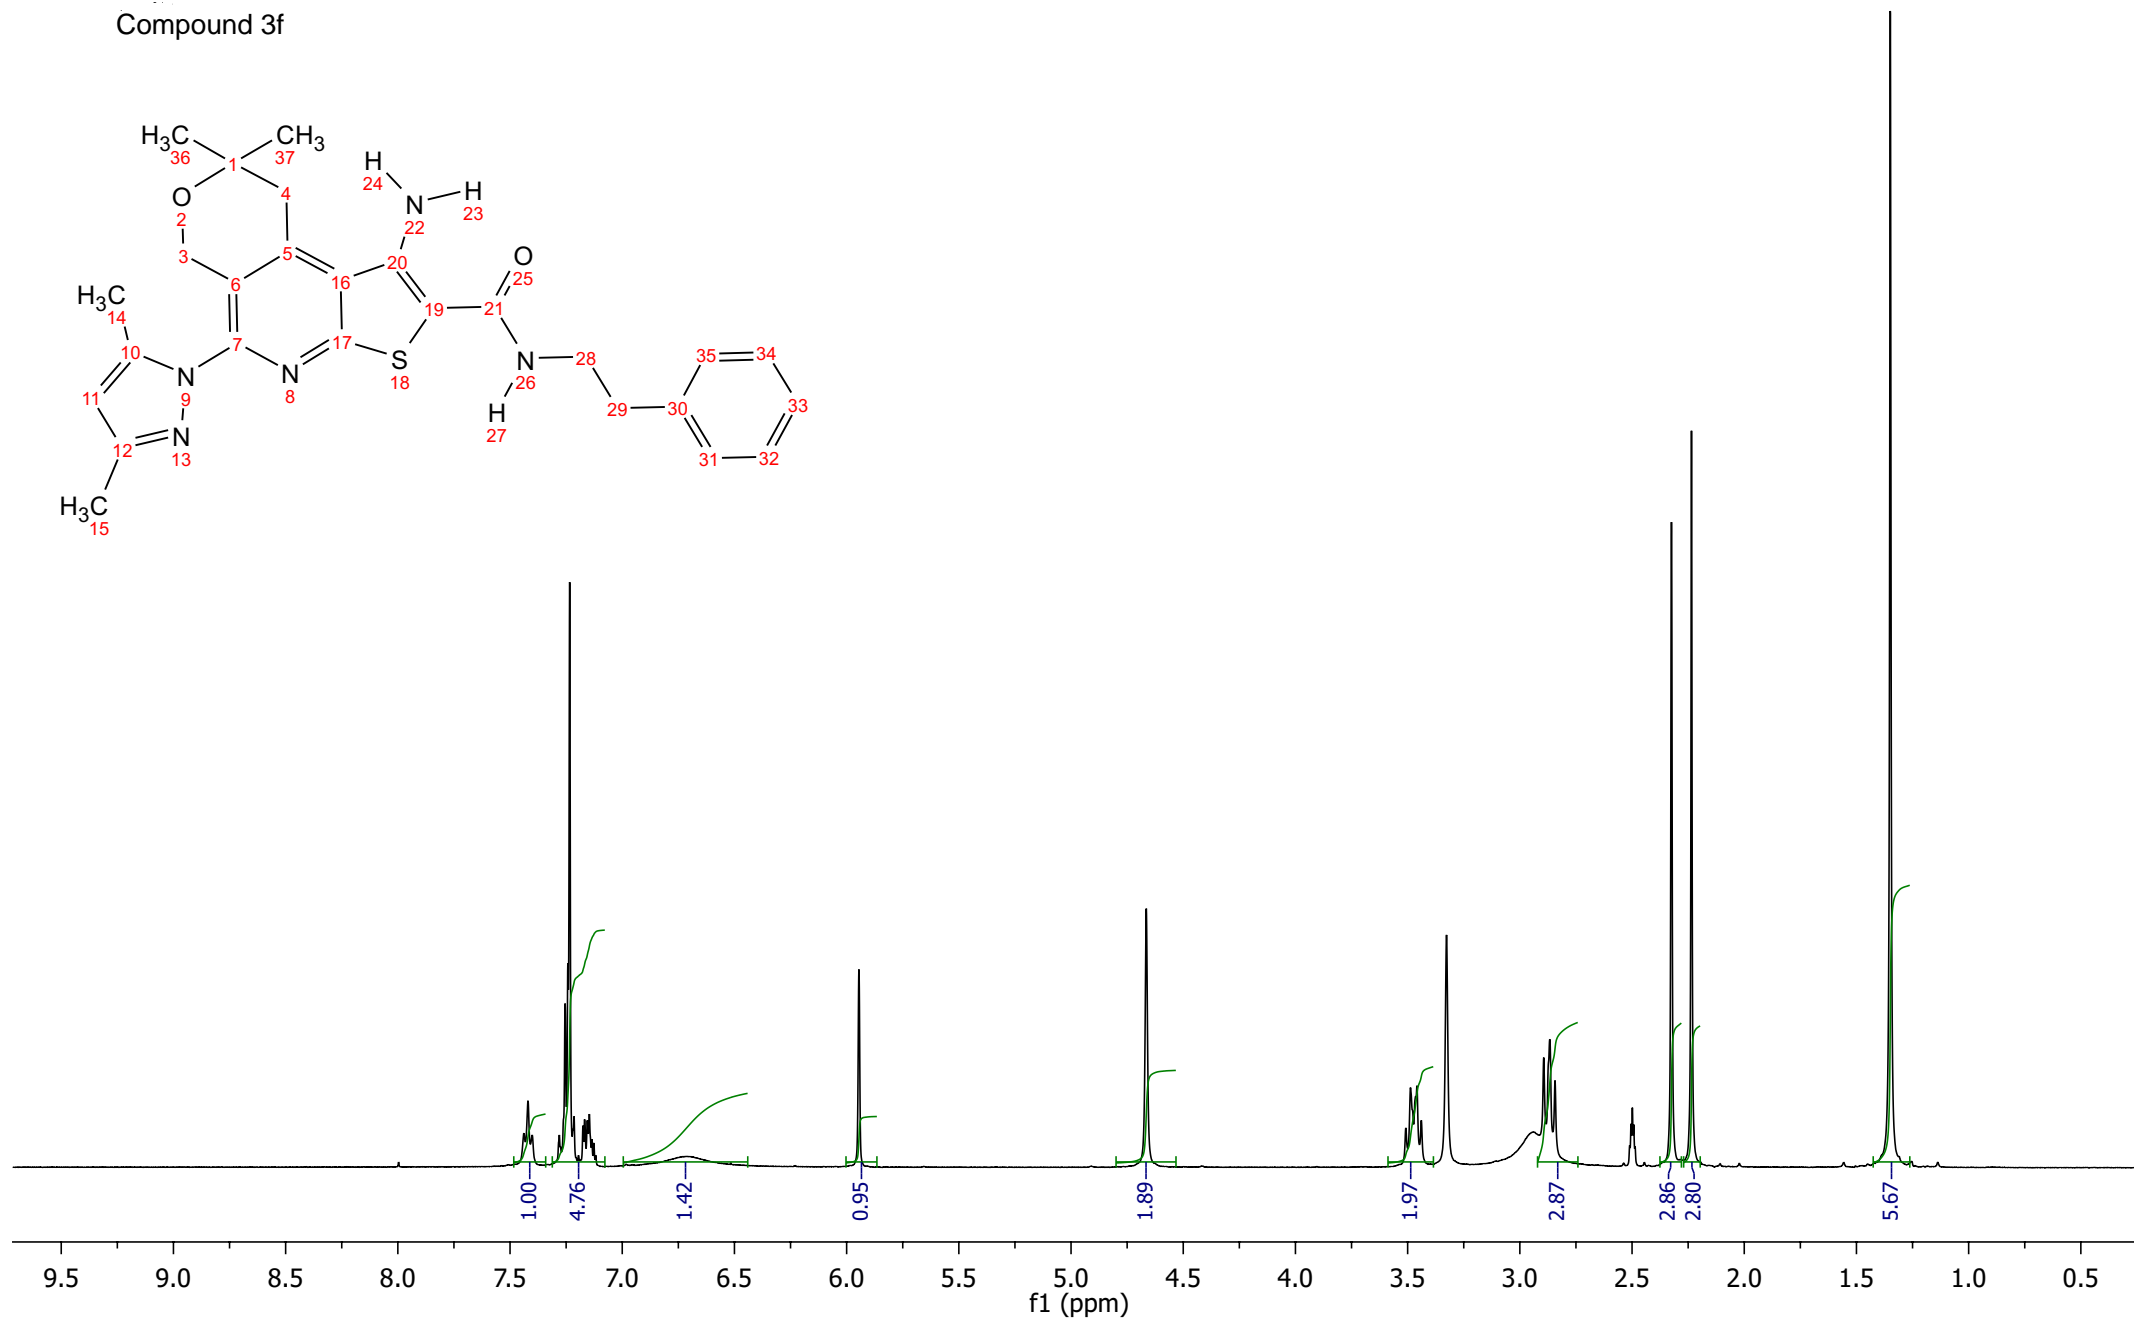

Supplement: s1 [file s1]

Compound 3c

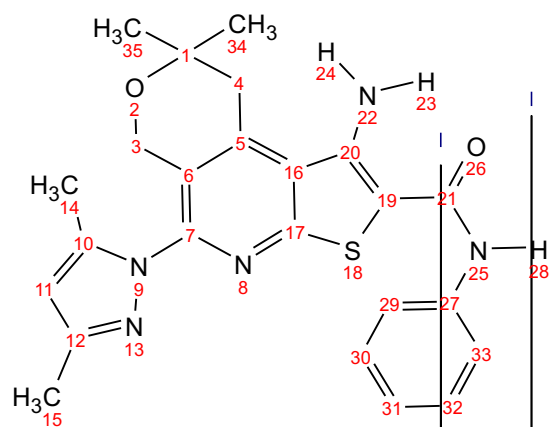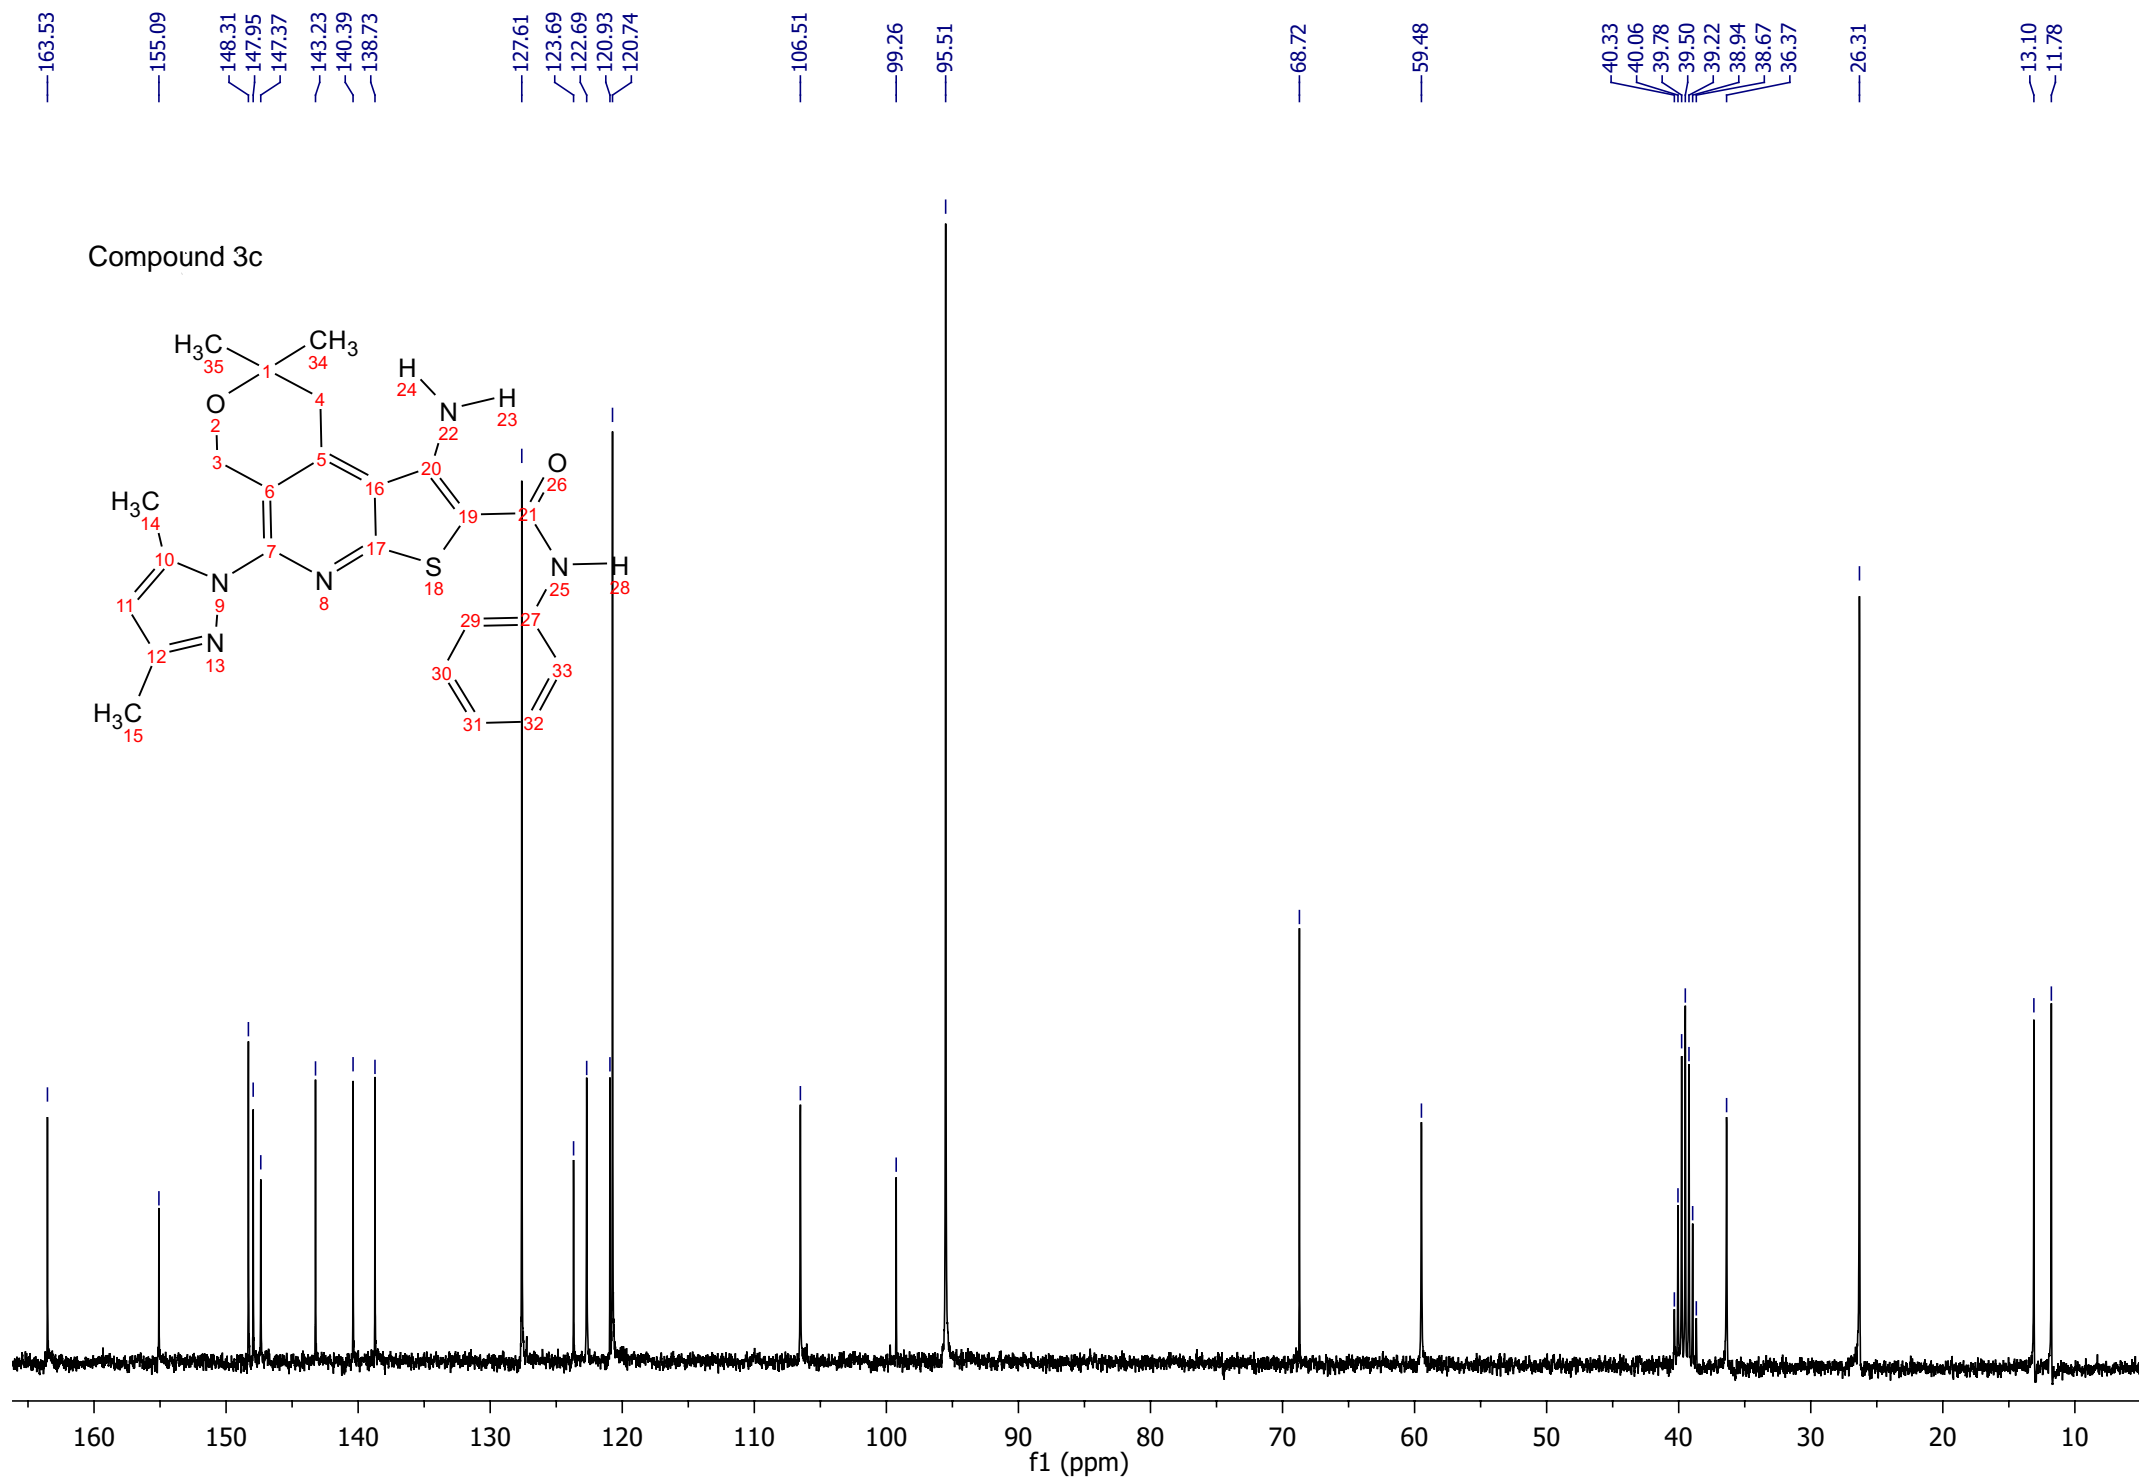

Supplement: s1 [file s1]

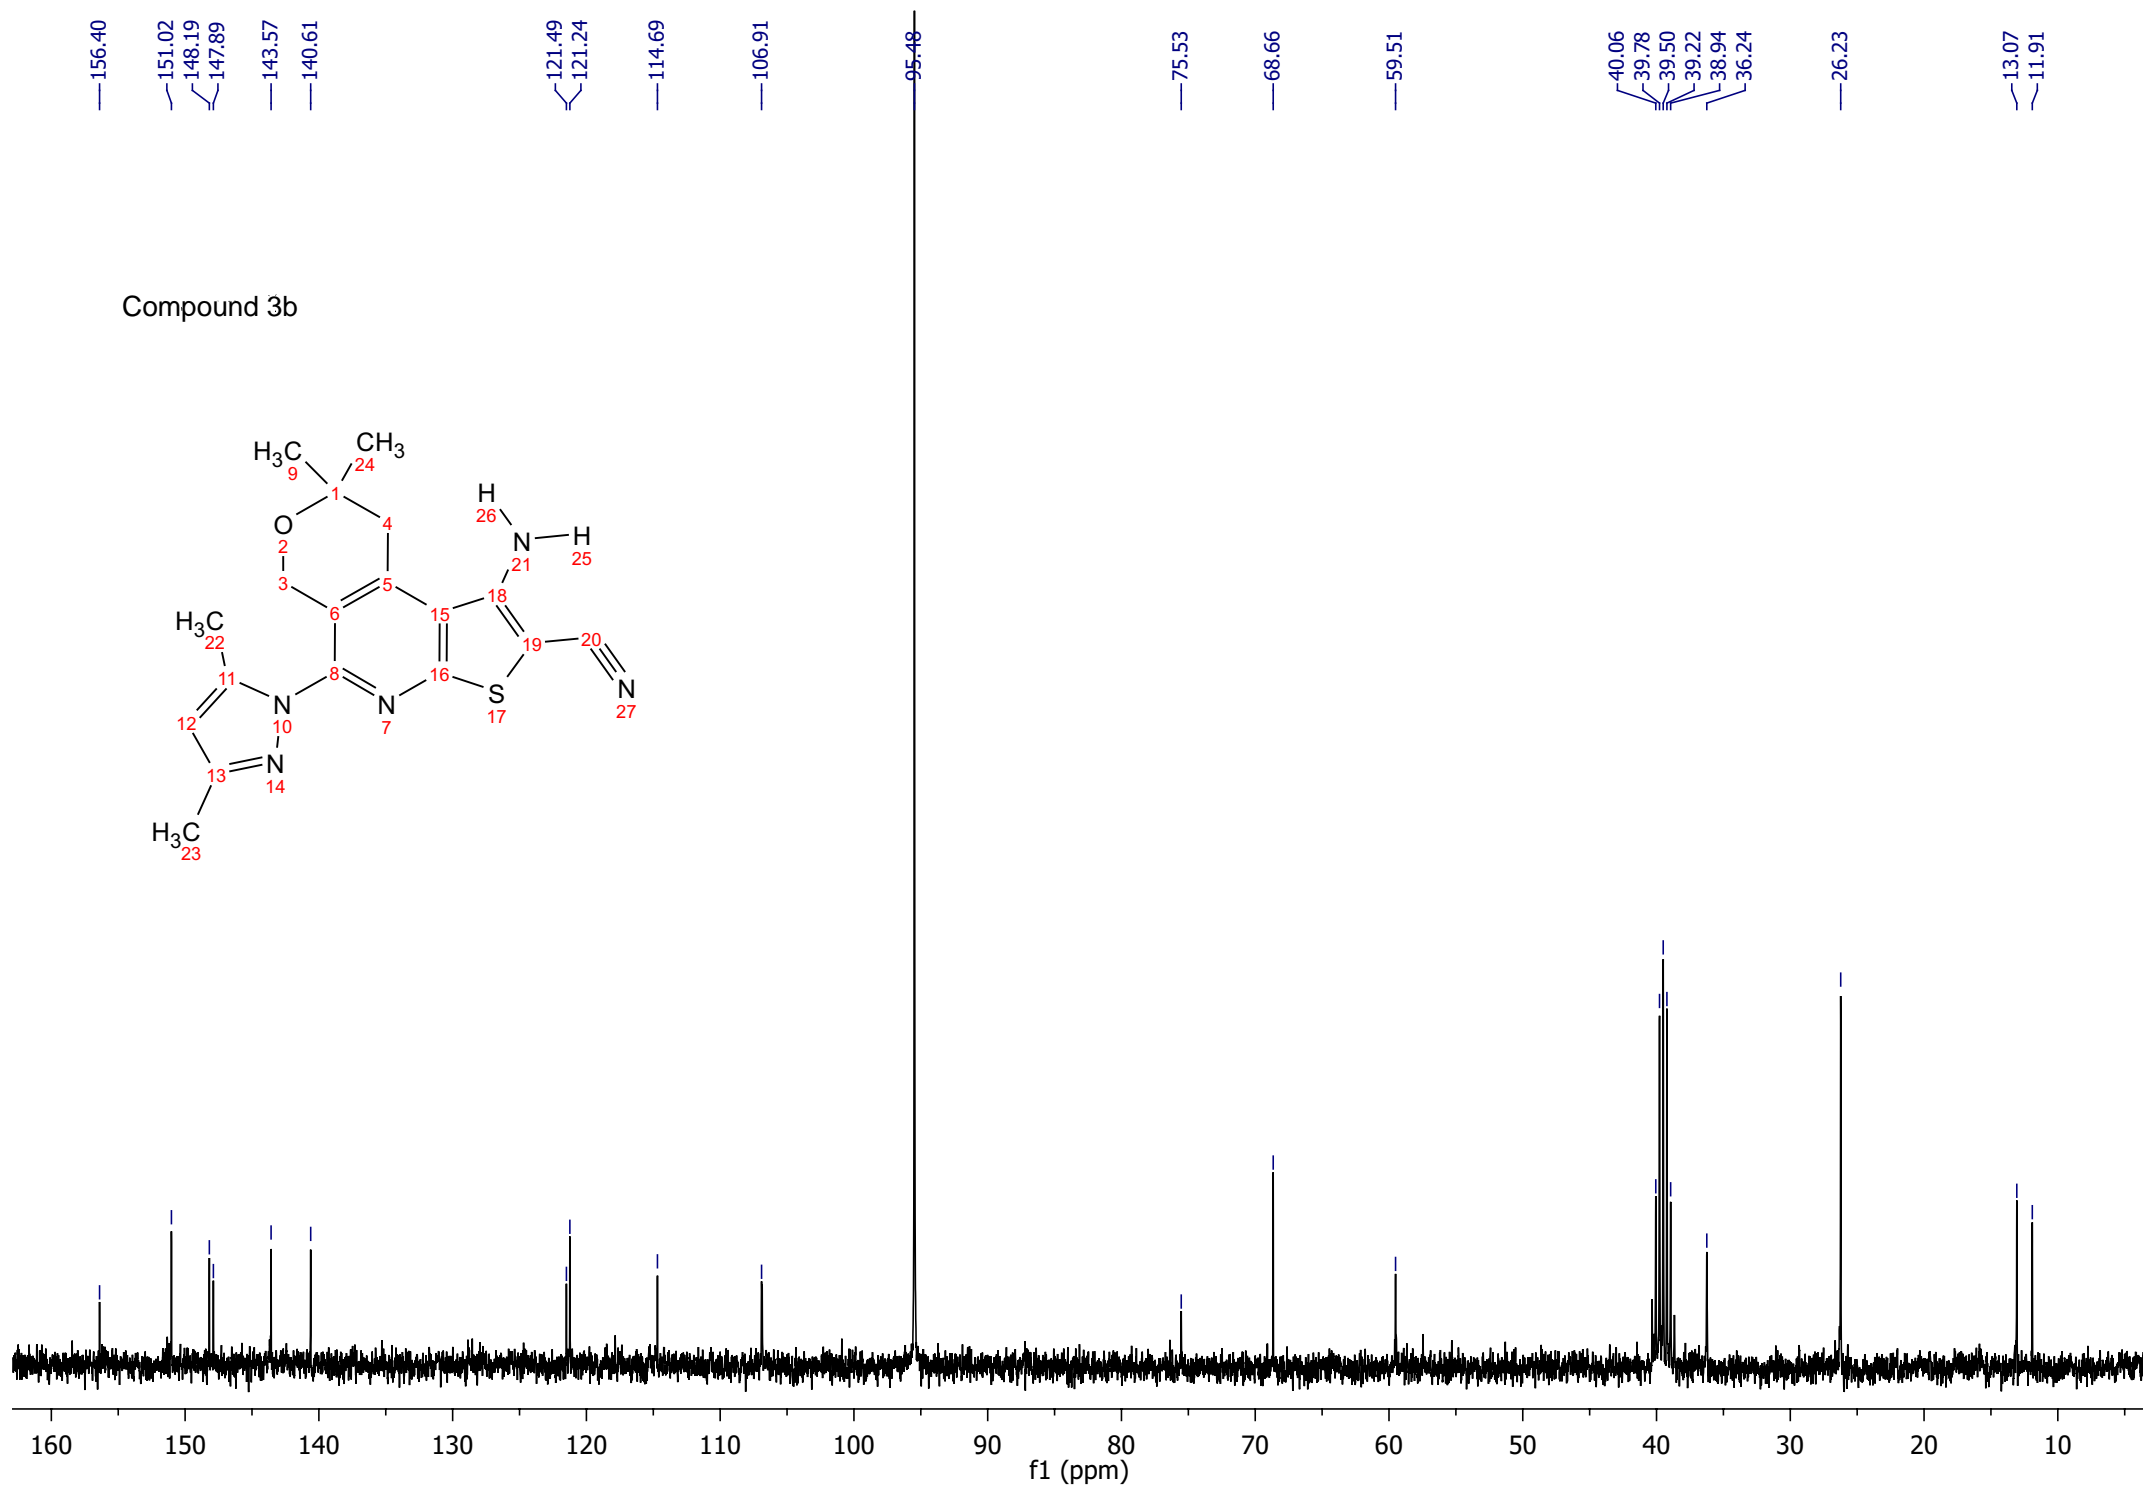

Supplement: s1 [file s1]

Compound 3d

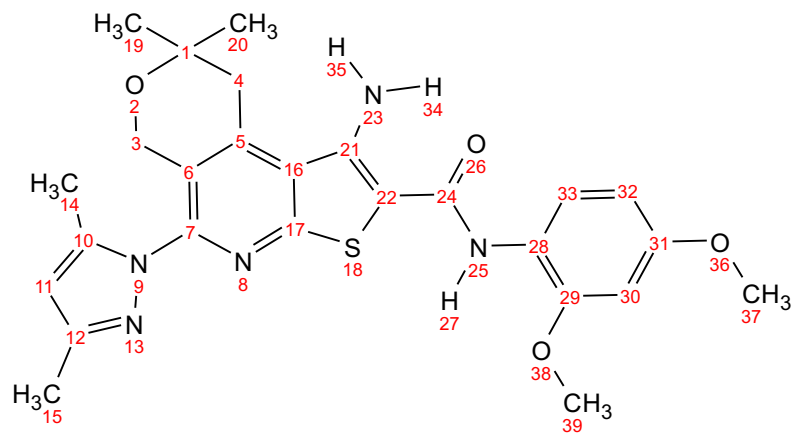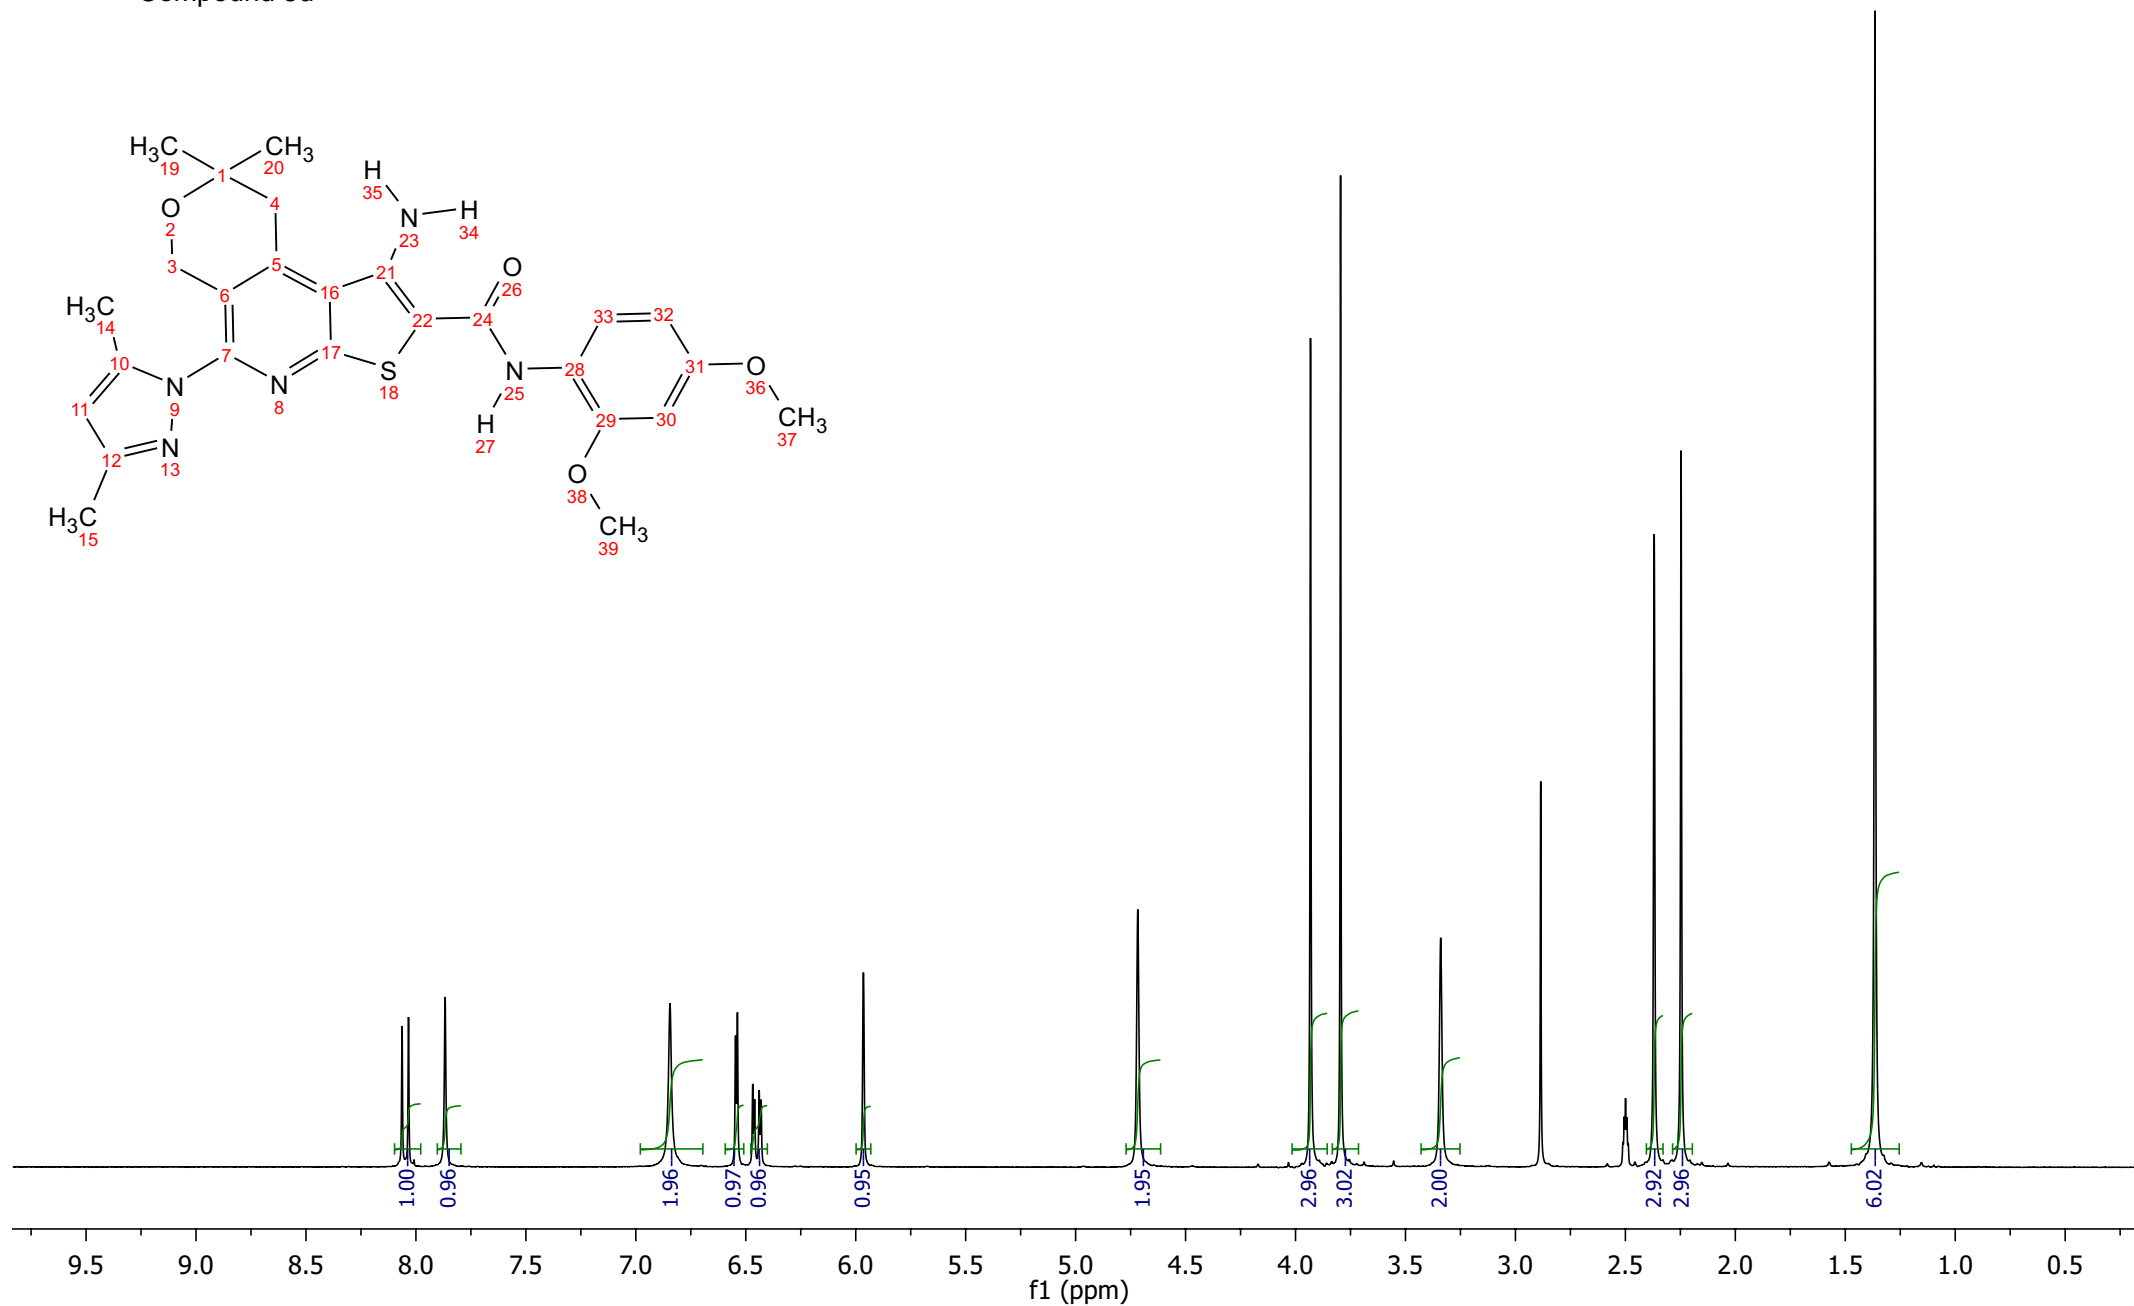

Supplement: s1 [file s1]
